Title: Spatial and temporal patterns of nitric oxide diffusion and degradation drive emergent cerebrovascular dynamics

William Haselden<sup>1,2</sup>, Ravi Teja Kedarasetti<sup>2</sup>, Patrick J. Drew<sup>1,2,3</sup>

<sup>1</sup> Neuroscience Graduate Program, MD/PhD Medical Scientist Training Program

<sup>2</sup> Department of Engineering Science and Mechanics

<sup>3</sup> Departments of Biomedical Engineering and Neurosurgery

Pennsylvania State University, University Park, Pennsylvania, United States of America

**Correspondence:** [pjd17@psu.edu](mailto:pjd17@psu.edu) (PJD)

1 **Abstract:** Nitric oxide (NO) is a gaseous signaling molecule that plays an important role  
2 in neurovascular coupling. NO produced by neurons diffuses into the smooth muscle  
3 surrounding cerebral arterioles, driving vasodilation. However, the rate of NO  
4 degradation in hemoglobin is orders of magnitude higher than in brain tissue, though how  
5 this might impact NO signaling dynamics is not completely understood. We used  
6 simulations to investigate how the spatial and temporal patterns of NO generation and  
7 degradation impacted dilation of a penetrating arteriole in cortex. We found that the  
8 spatial location of NO production and the size of the vessel both played an important role  
9 in determining its responsiveness to NO. The much higher rate of NO degradation and  
10 scavenging of NO in the blood relative to the tissue drove emergent vascular dynamics.  
11 Large vasodilation events could be followed by post-stimulus constrictions driven by the  
12 increased degradation of NO by the blood, and vasomotion-like 0.1-0.3 Hz oscillations  
13 could also be generated. We found that these dynamics could be enhanced by elevation  
14 of free hemoglobin in the plasma, which occurs in diseases such as malaria and sickle  
15 cell anemia, or following blood transfusions. Finally, we show that changes in blood flow  
16 during hypoxia or hyperoxia could be explained by altered NO degradation in the  
17 parenchyma. Our simulations suggest that many common vascular dynamics may be  
18 emergent phenomenon generated by NO degradation by the blood or parenchyma.

19

20

21

22

23

## 24 Introduction

25           Increases in neural activity in the brain typically are followed by the dilation of  
26 nearby arterioles<sup>1-6</sup> and potentially capillaries<sup>7,8</sup> (but see<sup>9</sup>). This relationship between  
27 neural activity and hemodynamic signals is known as neurovascular coupling (NVC). The  
28 dilation of these vessels lowers the local vascular resistance, leading to a local increase  
29 in blood flow and oxygenation that is the basis of many brain imaging techniques<sup>6,10</sup>. The  
30 maintenance of adequate coupling is thought to play a critical role in brain health<sup>11</sup>. In  
31 some cases, the vasodilation driven by increased neural activity is followed by a post-  
32 stimulus decrease in blood volume and flow below the pre-stimulus baseline, known as  
33 the post-stimulus undershoot<sup>12-14</sup>. This post-stimulus undershoot is not always observed,  
34 and its origin is not understood<sup>15</sup>. In addition to the post stimulus undershoot, arteries  
35 show spontaneous oscillations in diameter in the 0.1-0.3 Hz range, known as  
36 vasomotion<sup>16-22</sup>, whose origin is not understood. Thus, in addition to dilations linked to  
37 increases in neural activity, cerebral arterioles show a wide range of dynamic behaviors.

38           Multiple signaling pathways have been implicated in coupling neural activity to  
39 increases in blood flow<sup>23</sup>. Signals from astrocytes<sup>8,24-26</sup> and neurons<sup>27-32</sup> are both thought  
40 to contribute to driving neurovascular coupling. One pathway implicated in neurovascular  
41 coupling is nitric oxide (NO)<sup>33-35</sup>. NO is vasoactive<sup>36</sup> and affects neural excitability as  
42 well<sup>37</sup>. NO diffuses through aqueous and lipid mediums<sup>38,39</sup>, allowing for temporally and  
43 spatially complex signaling dynamics<sup>40-42</sup>. NO is produced by three types of nitric oxide  
44 synthases (NOS)<sup>43,44</sup>. The neuronal NOS (nNOS or NOS1) subtype of NOS is expressed  
45 by neurons<sup>45</sup>, while endothelial cells express endothelial NOS<sup>46</sup> (eNOS or NOS3), and  
46 synthesis of NO by both enzymes is coupled to intracellular calcium<sup>47</sup>. An inducible, non-

47 calcium dependent form of NOS is found in macrophages and other cells<sup>48</sup> (iNOS or  
48 NOS2), and is not found in the healthy brain. NO activates guanylyl cyclase (GC) in  
49 nearby cells to produce a rise in cGMP<sup>49</sup> and elicit vasodilation<sup>38,50–53</sup>. Despite the  
50 importance of NO in neurovascular coupling, *in vivo* measurements of NO levels in the  
51 brain have remained elusive<sup>54</sup>. Direct physiologic measurements of NO concentrations  
52 in tissue is confounded by recruitment of iNOS during injury and the non-specificity of  
53 probes<sup>55</sup> which may account for the large range in NO concentration reported in the  
54 literature<sup>54</sup>. At high concentrations, NO will block respiration in mitochondrial cytochrome  
55 c oxidase (CcO), and result in cellular damage from inhibited respiration and free radical  
56 formation<sup>56,57</sup>. Because of this toxic effect on mitochondrial respiration, there will be an  
57 upper bound on NO levels in the healthy brain. Understanding the role of NO in  
58 neurovascular coupling is a topic of ongoing research<sup>8,11,34,54,58–67</sup>. Modulation of NO  
59 production within the physiological range has been shown to precede vascular  
60 responses<sup>60</sup> and modulation of NO availability alters baseline vessel diameter<sup>35,62</sup>.  
61 Inhibition of NO production blunts or abolishes the hemodynamic response<sup>33,34</sup> and  
62 causes reduction in baseline blood flow<sup>35</sup>. NO has been speculated to play a modulatory  
63 rather than a direct role in neurovascular coupling because adding a NO donor while  
64 inhibiting NOS can rescue the hemodynamic response<sup>62</sup>, though NO has a role in  
65 increasing neuronal excitability<sup>68–72</sup>, making the interpretation of these results difficult.

66 NO levels will depend not only on the dynamics of NO production, but also the  
67 degradation rate. In the tissue, NO degradation is proportional to the partial pressure of  
68 oxygen so levels of NO will tend to inversely vary with tissue oxygenation<sup>73,74</sup>. However,  
69 the majority of NO is scavenged by hemoglobin in the blood and can do so a thousand-

70 fold faster than the surrounding tissue<sup>73,75-78</sup>. Because NO reacts with hemoglobin at  
71 much higher rates than the tissue, the hemoglobin present inside a vessel plays an  
72 appreciable role in shaping NO concentrations at the smooth muscle where it acts. Under  
73 normal conditions, most hemoglobin in the blood is confined to red blood cells, with low  
74 levels in the plasma. Due to fluid dynamics<sup>79-81</sup>, red blood cells will be excluded from the  
75 few micrometer-thick cell free layer next to the endothelial cells, providing a measure of  
76 spatial separation between the region of high NO degradation and the smooth muscles.  
77 However, if hemoglobin levels in the plasma rise (due to pathology or other processes)<sup>82-  
78 89</sup>, this will greatly increase the degradation rate of NO in the plasma, leading to decreased  
79 NO levels in the smooth muscle<sup>83,90-92</sup>. NO's diffusive properties and known reaction  
80 rates lend themselves to computational approaches to understanding NO  
81 signaling<sup>38,59,75,78,93-98</sup>. While there have been detailed and informative models of NO  
82 signaling from endothelial cells<sup>59,91,96,99,100</sup> showing that the size of the arteriole<sup>75</sup> and  
83 properties of the blood<sup>96</sup> are vital components to understanding NO signaling, the insight  
84 from these models that the spatial location of blood plays an important role in the  
85 degradation of NO has not been applied to neurovascular coupling or in a dynamic setting.

86 Intriguingly, *in vitro* experiments have shown that NO released by endothelial cells  
87 can depolarize axons<sup>67</sup>, and flow changes in vessels can alter interneuron activity<sup>65</sup>,  
88 potentially providing a mechanism by which vascular cells can modulate neural activity.  
89 The idea there is bidirectional signaling between neurons and the vasculature ('hemo-  
90 neural' hypothesis<sup>101,102</sup>) has been put forward, though there is no definitive candidate  
91 mechanism. Signaling through NO-dependent pathways is a possible mechanism for the  
92 hemo-neural coupling, as NO is known to affect neural excitability and vasodilation, and

93 the amount of blood present could impact NO levels in the parenchyma through  
94 scavenging.

95 In order to understand how neuronal sources of NO communicate with the  
96 vasculature, we simulated NO production around a penetrating arteriole. In this model,  
97 the diameter of the vessel was dynamically dilated in response to the levels of NO present  
98 in the smooth muscle. We found that the sources of NO needed to be close to the arteriole  
99 to prevent inhibition of mitochondrial respiration. The increased amount of hemoglobin  
100 present during dilation greatly increased the removal of NO, which drove arteriole  
101 dynamics such as vasomotion and a post-stimulus undershoot. The concentration of  
102 plasma free hemoglobin in the blood was able to alter these vasodynamics. NO was able  
103 to function as an oxygen sensor in our model because its rate of removal in the  
104 parenchyma is dependent on the partial pressure of oxygen in the tissue. Finally,  
105 simulations imposing increases in vessel diameter when NO production rates were not  
106 varied resulted in a decrease in NO levels in the parenchyma, suggesting a potential  
107 mechanism for hemo-neural coupling. These results suggest that the diffusion and  
108 degradation of NO can drive emergent vascular dynamics.

## 109 **Results**

110 In the cortex, penetrating arteries enter into the parenchyma perpendicular to the  
111 pial surface, and supply blood to a cylindrical volume of brain tissue approximately a  
112 hundred microns in radius<sup>103–107</sup> (**Figure 1A**). The arteriole is surrounded by a layer of  
113 smooth muscle, and most of the branches off the arteriole are found in the deeper layers  
114 of cortex. The diameter of the penetrating arteriole is an important (but not the only)  
115 regulator of local blood flow<sup>8,108,109</sup>. Because the geometry of the vasculature is complex

116 and variable<sup>110,111</sup>, we simplified the geometry to a single penetrating arteriole surrounded  
117 by a cylinder of neural tissue (**Figure 1B**). The model consisted of five layers, the red  
118 blood cell (RBC) core, the cell free layer, the endothelial cells, smooth muscle and the  
119 parenchyma (**Figure 1C,D**). Each layer has an associated NO production and  
120 degradation rate, and NO is produced in both the endothelial cell layer and the  
121 parenchyma. The thicknesses of the RBC core and cell-free layer were specified for each  
122 diameter according to fits taken from empirical data<sup>79,80</sup>. Unless otherwise specified, the  
123 concentrations of NO and oxygen were calculated using Fick's equation and the Krogh  
124 model respectively. The parenchyma was treated as a nearly incompressible linear  
125 elastic solid, but the total NO production rate was held constant during dilation-induced  
126 deformations. We determined if the flow of blood will have an impact on smooth muscle  
127 NO levels using a model that includes the transportation of NO by movement of blood  
128 (see Methods). While the flow of blood will cause a convection of NO downstream, at  
129 physically plausible blood flow velocities the impact on NO concentrations is miniscule  
130 (**Figure 2–figure supplement 1**), consistent with a high Damkohler number (ratio of  
131 diffusion to convection)<sup>75,99,112</sup>. The lack of an appreciable effect of convection by the  
132 blood on NO levels allowed us to ignore convection, greatly simplifying our simulations.

### 133 ***Effects of vessel size and NO production location on smooth muscle NO*** 134 ***concentration***

135 We first asked how the spatial arrangement of NO production relative to the  
136 arteriole and the size of the arteriole impacted the concentration of NO in the smooth  
137 muscle. We explored three different spatial profiles of NO production (**Figure 2A**). Early  
138 models of NO diffusion dynamics assumed homogenous NO production in the tissue<sup>38,113</sup>,

139 which we refer to as the ‘uniform’ condition. However, there is anatomical evidence that  
140 nNOS-expressing neurons and their processes may be concentrated around  
141 arterioles<sup>32,114,115</sup> (**Figure 2A**, proximal). In the proximal geometry, all NO was produced  
142 within 2  $\mu\text{m}$  of the smooth muscle<sup>114</sup>. We also considered an intermediate case, which  
143 we refer to as the ‘regional’ geometry. In this case, NO production is higher within 50  $\mu\text{m}$   
144 of the vessel<sup>32</sup>. In the uniform case, NO is produced uniformly throughout the  
145 parenchyma. We emphasize that we do not mean for these geometries to be detailed  
146 reconstructions of the actual NO production, but rather exemplars that allow us to  
147 understand the role of the spatial distribution of NO production in neurovascular coupling.  
148 We parametrically varied NO signaling for each combination of arteriole diameter, NO  
149 production and NO production location (**Figure 2D**) and evaluated their ability to signal  
150 the arteriole by the effective activation of guanylyl cyclase (GC) in the smooth muscle  
151 (**Figure 2C**). To match a given concentration of NO in the smooth muscle for a given  
152 geometry, the rate of NO production was varied. This is shown in **Figure 2B**, where the  
153 NO production rate required to reach 50% of the maximal activation of GC in a 40  $\mu\text{m}$   
154 diameter arteriole (outlined with a box in **Figure 2D**) was 0.02 M/s for the proximal  
155 geometry, 0.05 M/s for the regional geometry and 0.056 M/s for the uniform geometry.

156 We find that when holding the rate of NO production constant, the size of the vessel  
157 had an impact on the concentration in the smooth muscle. This can be seen by the  
158 upwardly sloping contour lines in all of the NO production geometries (**Figure 2D**). If  
159 there was no size dependence, these contours would be horizontal. This size  
160 dependence was due to the higher degradation rate of NO in the hemoglobin rich portion  
161 of the blood relative to the degradation rate in the tissue. As arteriole diameter increases,



162 more hemoglobin is present and more NO will be removed such that a higher production  
163 rate of NO is required to maintain the same concentration of NO in the smooth muscle.  
164 This parallels the experimental observation that the dilation of a vessel, as measured as  
165 a percentage of its baseline diameter, is inversely related to its resting size<sup>1,116,117</sup>,  
166 suggesting that degradation of NO by hemoglobin may contribute to size-dependence of  
167 arteriole reactivity. We explore the impact of vessel-size dependence of NO degradation  
168 in our dynamical models of dilation below.

169 We also find for a given concentration of NO in the smooth muscle, the different  
170 NO production geometries show markedly different concentrations of NO in the  
171 parenchyma (**Figure 2B**). This is because NO is not only degraded in the blood but also  
172 in the tissue (albeit at a substantially lower rate). The further the NO must diffuse to reach  
173 the smooth muscle, the larger the fraction that will be degraded before reaching its target.  
174 This means that the concentration of NO at a distant source (the parenchyma in the  
175 uniform model) must be higher than for a closer source (the proximal model). This high  
176 concentration of NO in the brain tissue for the uniform and regional production models  
177 can have adverse effects on mitochondrial respiration when oxygen levels fall, which we  
178 explore below.

### 179 ***Impact of NO levels on mitochondrial respiration***

180 We set out to determine the impact the spatial pattern of NO production has on  
181 mitochondrial respiration. High levels of NO are toxic, because NO competes with oxygen  
182 for the rate-limiting enzyme in aerobic respiration, cytochrome c oxidase<sup>56,118</sup>. At very  
183 high levels of NO and low levels of oxygen, the reaction of NO with cytochrome c oxidase  
184 can be irreversible<sup>119</sup>. This inhibition of mitochondrial respiration by NO puts an upper

185 limit on the levels of NO present in the healthy brain. Using the NO concentration profiles  
186 calculated above, combined with peri-arterial oxygen profiles derived from *in vivo* oxygen  
187 measurements using phosphorescent oxygen probes<sup>120–123</sup>, we calculated the  
188 cytochrome c oxidase activity as a function of distance from the simulated penetrating  
189 arteriole (**Figure 3A**). Close to the artery, the capillary density is low, and oxygenation of  
190 tissue is largely supplied by the artery<sup>124</sup>. As respiration depends on oxygen tension, the  
191 respiration rate will fall with distance from the vessel. However, this only becomes an  
192 issue for regional and uniform models of NO production. At levels of NO production that  
193 drive high levels of guanylyl cyclase activation in the smooth muscle, the combination of  
194 high NO levels and low levels of oxygen will result in irreversible inhibition of mitochondrial  
195 respiration in the tissue distant from the vessel. A parameter sweep of NO production  
196 rates (expressed as guanylyl cyclase activation in the smooth muscle) and vessel size  
197 shows that for both the regional and uniform models, high levels of NO production can be  
198 toxic for an appreciable fraction of the tissue (**Figure 3B**). Though this hypoxia will be  
199 mitigated by capillaries supplying oxygen to tissue distant from the arteriole, these  
200 simulations suggests that keeping the site of NO production close to the smooth muscle  
201 may prevent tissue damage associated with high NO levels.

### 202 ***Biphasic hemodynamic responses from increased NO removal by blood during*** 203 ***vasodilation***

204 A larger arteriole degrades more NO than a smaller one, enough to alter NO levels  
205 appreciably in smooth muscle at steady state. We then investigated whether a similar  
206 process could occur during vasodilation and what impact it would have on vasodynamics.  
207 We moved to a dynamic model, in which the concentration of NO in smooth muscle

208 dynamically dilated the vessel (**Figure 4–figure supplement 1**). An important parameter  
209 in these simulations is the sensitivity of the dilation to changes in GC activation, captured  
210 in our simulations in the parameter ‘m’, (which will have the units of  $\frac{\Delta dilation, \%}{\Delta GC\ activation, \%}$ , see  
211 Methods). The sensitivity of arteries to NO is known to vary<sup>50,125–128</sup>, and the larger m is,  
212 the more sensitive the artery is to changes in NO concentrations. Empirically, studies  
213 suggest m is in the range of 1-5, with m=5 giving dilations comparable to the largest  
214 stimulus evoked dilations in awake animals<sup>1,117,129,130</sup>. The key interaction in this model  
215 was that the dilation of the arteriole caused an increase in the local hemoglobin  
216 concentration via an increase in the size of the red blood cell-containing ‘core’ (RBC core)  
217 (**Figure 4–figure supplement 1, Figure 4B**). This increase in hemoglobin would in turn  
218 cause an increase in NO degradation, which functions as a delayed negative feedback  
219 on NO levels in the smooth muscle. The dilation will be delayed relative to the increase  
220 in NO production due to diffusion time, and the latency of the signal transduction cascade  
221 transducing the elevation of NO levels in the smooth muscle into relaxation. We wanted  
222 to understand if this separation of timescales could produce vasodynamics like those  
223 seen *in vivo*. For all subsequent simulations we use the proximal NO production  
224 geometry.

225 We first simulated the effects of a transient increase in NO production, similar to  
226 what would be generated in response to a brief elevation of neural activity in response to  
227 a stimulus. The effects of a stimulus were implemented by doubling parenchymal NO  
228 production for 1 second (**Figure 4A**). When the increased arteriole diameter elevated  
229 NO scavenging by increasing the amount of hemoglobin (**Figure 4B**), NO concentrations  
230 in the smooth muscle dropped below baseline during vasodilation (**Figure 4B**, black),

231 even though there is no corresponding decrease of NO production below baseline  
232 (**Figure 4A**). The drop in NO concentration in the smooth muscle results in a post-  
233 stimulus undershoot (**Figure 4B**, red), reminiscent of the canonical HRF seen *in*  
234 *vivo*<sup>1,28,131</sup>. We hypothesized that this undershoot was driven by the increased  
235 hemoglobin in the vessel that would naturally take place when the vessel dilated. To test  
236 this hypothesis, we performed simulations where the RBC core was kept at a constant  
237 diameter when the arteriole dilated (**Figure 4C**). Without the increase in NO degradation  
238 mediated by an increase in hemoglobin, the post-stimulus undershoot was not observed  
239 (**Figure 4C**, blue). To better visualize the differences between the two conditions, we  
240 plotted the two responses together (**Figure 4D**). The (physically realistic) variable core  
241 model shows a clear undershoot, (**Figure 4D**, red) while the constant core model does  
242 not (**Figure 4D**, blue). The variable core model could generate arterial dilation dynamics  
243 qualitatively similar to those seen in awake mice in response to sensory stimulation<sup>1</sup>  
244 (**Figure 4–figure supplement 2**). Together, these suggest that the increased NO  
245 scavenging in the RBC core during vasodilation can be a contributing factor to the post-  
246 stimulus undershoot in arterial diameter.

#### 247 ***Interplay of vasodilation and NO degradation can generate vasomotion oscillations***

248 We then sought to quantify the effects of an increase in NO scavenging  
249 accompanying dilation on arteriole dynamics. The relationship between a stimulus or  
250 neural activity and the vascular dynamics is captured by the hemodynamic response  
251 function<sup>131</sup> (HRF). The HRF is a linear kernel that low-pass filters neural activity into a  
252 change in vessel diameter. This kernel can be easily extracted from the response (in this  
253 case, artery diameter) to a spectrally white input<sup>117,132,133</sup> (in this case, NO production

254 linked to neural activity). To better understand how NO degradation dynamics impact  
255 neurovascular coupling, we simulated the response of both the variable RBC core and  
256 constant RBC core models (**Figure 5G**, red & blue) to randomly varying ('white noise')  
257 NO production (**Figure 5G**, black). We then deconvolved out the HRF (using the modified  
258 Toeplitz matrix method<sup>131</sup>) (**Figure 5B,E**) from the vascular response. We found that  
259 there was an undershoot in the variable RBC core model (**Figure 5B**), but no undershoot  
260 following the dilation of the constant RBC core model (**Figure 5E**). The undershoot was  
261 driven by the decreased NO levels in the smooth muscle accompanying dilation due to  
262 the larger amount of hemoglobin in the dilated artery (**Figure 4B**), and the magnitude of  
263 the undershoot increased with increasing sensitivity to NO (**Figure 5B**). Even though  
264 the undershoot was an emergent property in the simulations, it was still linear, as the  
265 variance explained by the HRF was very high ( $R^2 \sim 0.95$ ) (**Figure 5-figure supplement**  
266 **1**). By looking at the power spectrum of the arteriole diameter changes elicited by white  
267 noise NO production we can see the frequency response properties of the system.  
268 Interestingly, the power is highest in the 0.1 - 0.3 Hz frequency band of the power  
269 spectrum of the artery diameter in the variable RBC core model (**Figure 5C**), showing  
270 that this system effectively acts as a band pass filter. This peak is reminiscent of  
271 vasomotion, a rhythmic 0.1 - 0.3 Hz oscillation in cerebral artery diameter observed in  
272 awake and anesthetized animals, *in vitro* and in humans<sup>16-18,131,134,135</sup>. When the  
273 vasodilation does not increase NO scavenging, as is the case when the RBC core is held  
274 constant, no undershoot (**Figure 5E**) or elevation of power in the 0.1 – 0.3 Hz band were  
275 observed (**Figure 5F**). This comparison of the dynamic and constant RBC core models  
276 highlights the importance of NO degradation on vascular dynamics (**Figure 5H,I**). The

277 effects of NO scavenging by increased hemoglobin likely work in concert with other  
278 drivers of vasomotion<sup>136–139</sup> to generate these oscillation *in vivo*.

### 279 ***Influence of plasma free hemoglobin and hematocrit on vasodynamics***

280 Because NO is mainly degraded by the blood, we expected that changing  
281 hematologic properties such as free hemoglobin (Hgb) or hematocrit (Hct) would alter  
282 NO-mediated signaling. Hematocrit varies with sex<sup>140</sup>, and can be elevated by drugs<sup>84,141</sup>  
283 or prolonged exposure to high altitude<sup>142,143</sup>. While NO is typically degraded by  
284 hemoglobin (Hgb) in RBCs, free Hgb in the plasma can scavenge NO up to 1,000-fold  
285 faster than in the RBC membrane<sup>144,145</sup>. Under normal conditions free Hgb levels in the  
286 plasma are low, and the impact of this free Hgb on NO levels is minimal. However,  
287 plasma free Hgb can be elevated in sickle cell disease<sup>83</sup>, malaria<sup>146</sup> or following blood  
288 transfusions<sup>147</sup>. Elevation of free plasma Hgb can cause cardiovascular issues<sup>85,148–151</sup>  
289 due to the increased scavenging of NO<sup>152,153</sup>.

290 We first explored the effects of altering plasma free Hgb. Increasing free Hgb  
291 (**Figure 6A**) reduced arteriole diameter (**Figure 6B**) though depletion of perivascular NO  
292 (**Figure 6C**), consistent with *in vivo* experiments<sup>154</sup>. The increase in free Hgb resulted in  
293 a larger post-stimulus undershoot (**Figure 6D**), and an increase in the band-pass like  
294 properties of the arteriole (**Figure 6E**). These simulations suggest that in addition to other  
295 symptoms, elevated plasma free hemoglobin may also cause constriction of cerebral  
296 arterioles and alter the dynamics of hemodynamic responses. Increasing hematocrit  
297 resulted in decreases in baseline arteriole diameter (**Figure 6–figure supplement 1B**)  
298 and perivascular NO (**Figure 6–figure supplement 1C**) in the model. However, neither  
299 the HRF, nor frequency response properties of the vessel were appreciably affected by

300 varying the hematocrit (**Figure 6–figure supplement 1D,E**). The lack of an effect can  
301 be attributed to the fact that even under different hematocrit concentrations the location  
302 of NO scavenging remains unchanged. However, when increasing free Hgb in the  
303 plasma, the compartmentalizing effects of the CFL is compromised and the location of  
304 NO scavenging shifts from the center of the lumen to much closer to its source<sup>75,97,155,156</sup>.  
305 With NO being scavenged much closer to the smooth muscle, any changes to the rate of  
306 scavenging (such as increased hemoglobin during dilation) are amplified. While both  
307 hematocrit and free Hgb in the plasma contribute to determining baseline arteriole tone  
308 these simulations suggest that plasma free hemoglobin can also have a substantial effect  
309 on vasodynamics through a NO-mediated mechanism.

### 310 ***NO can act as sensor of cerebral oxygenation***

311 Despite the lack of an known oxygen sensor in the brain, hypoxia will dilate and  
312 hyperoxia will constrict cerebral arterioles<sup>157–174</sup>. These cerebrovascular responses to  
313 blood oxygenation are modulated by NO availability<sup>157,169,175–179</sup>, occur under isocapnic  
314 conditions<sup>177,179</sup> and constant pH<sup>177</sup>. We wanted to investigate if changes in NO  
315 consumption due to oxidative reactions in the parenchyma could contribute to hypoxia-  
316 induced vasodilation. The first order dependence of NO removal on tissue oxygen  
317 concentration<sup>73</sup> would mean that NO would be degraded faster under a hyperoxic  
318 condition. Elevated oxygen concentrations could constrict arterioles by depleting  
319 perivascular NO, and conversely low oxygen could dilate arterioles by consuming less  
320 NO, effectively allowing NO to functioning as a local oxygen sensor. We tested this idea  
321 by dynamically varying the oxygen levels in the artery (**Figure 7A,B**) and looking at the  
322 resulting changes in vessel diameter (**Figure 7D**) due to changes in parenchymal NO

323 degradation (**Figure 7C**). Using a baseline arteriole oxygen concentration of 65mmHg<sup>120–</sup>  
324 <sup>123</sup>, we varied arteriole oxygen tension in the range from 0 to 125 mmHg<sup>180</sup>. Hypoxia  
325 drove dilation, and hyperoxia drove vasoconstriction, though not with as large of  
326 magnitude (**Figure 7E**). The observation that in our model hypoxia drove a larger dilation  
327 than hyperoxia drove constriction is consistent with *in vivo* observations<sup>166,170,181</sup>. These  
328 results highlight NO's potential to function as a local oxygen sensor by linking perivascular  
329 oxygen concentrations to vascular tone through an oxygen dependent rate of NO removal  
330 in the parenchyma.

### 331 **Impact of vasodilation on parenchymal NO concentration**

332 It has been proposed that changes in the vasculature can drive changes in neural  
333 activity<sup>101</sup>. As the degradation of rate of NO is greatly influenced by the amount of  
334 hemoglobin and NO levels affect neural excitability<sup>69,70</sup>, we hypothesized that changes in  
335 NO concentration driven by vasodilation might be able to drive changes in NO levels of  
336 nearby neurons. In all our previous simulations, the concentration of NO in the smooth  
337 muscle has thus far changed with size of the arteriole. Therefore, we then asked how  
338 vasodilation due to other pathways<sup>2,8,11,23–26,30,32,182</sup> will impact parenchymal NO levels.  
339 We isolated the influence of vasodilation on parenchymal NO in the model by imposing  
340 changes in arteriole diameter (**Figure 8B**) in the background of a constant NO production  
341 rate (**Figure 8A**). This vasodilation caused a decrease of NO in the smooth muscle  
342 (**Figure 8C**). Because as the vessel dilates, it slightly distorts the tissue, we looked at the  
343 parenchymal NO concentrations relative to the outer edge of the smooth muscle and  
344 adjusted for deformation, rather than from the vessel centerline. We found that  
345 vasodilation caused an appreciable drop in the NO concentrations in the parenchyma



346 **(Figure 8D)**. We then parametrically varied the sign and amplitude of the vessel diameter  
347 change and looked at the impact of these diameter changes on parenchymal NO levels.  
348 We found that dilation and constriction in a physiologically plausible range can produce  
349 substantial changes in parenchymal NO **(Figure 8E)**, large enough to potentially alter  
350 neural excitability. These simulations identify a potential mechanism by which neurons  
351 can receive information about the state of nearby vessels.

## 352 **Discussion**

353 Computational models of diffusion have complemented experimental techniques  
354 to give us insights into how NO signals the vasculature. Pioneering work by Lancaster<sup>38</sup>,  
355 Wood and Garthwaite<sup>39</sup>, and others<sup>59,76,91,96,97,99,100,178,183</sup> have demonstrated the  
356 importance of NO degradation by the blood in shaping the efficacy of NO signaling.  
357 Building upon their work, we apply the insights gained from modeling NO dynamics to  
358 neurovascular coupling. By coupling NO-dependent changes in arteriole tone and blood  
359 supply to a model of NO diffusion we are able to reproduce many of the commonly  
360 observed arteriole dynamics. These include the size dependence of arteriole dilation,  
361 vasomotion, the post-stimulus undershoot, and hypoxia-induced vasodilation. We show  
362 that in addition to the neural production of NO, consumption of NO by the blood also has  
363 the potential to modulate the hemodynamic response and that many pathologically  
364 homologous conditions may disrupt neurovascular coupling via increased NO  
365 degradation.

366 There are several caveats to our work. Though for simplicity we did not simulate  
367 other neurovascular coupling pathways<sup>2,8,11,23–26,30,32,182</sup>, this should not be taken to mean  
368 that NO-mediated coupling is the only (or even primary) neurovascular coupling

369 mechanism. While there is a wide range of NO concentrations measured in the tissue<sup>54</sup>,  
370 the levels of NO that drive GC activation have been consistent across several  
371 studies<sup>50,184</sup>. Additionally, none of the results here are sensitive to the absolute levels of  
372 NO or GC activation, as they depend on the fact that degradation of NO is much higher  
373 in the presence of hemoglobin. Finally, we used simplified vascular and neural  
374 geometries in order to gain insight into how NO production and degradation dynamics  
375 might impact neurovascular coupling. Future work that combines large-scale vascular  
376 reconstructions<sup>110,111</sup> paired with detailed mapping of neuronal cell-type locations<sup>185,186</sup> in  
377 the brain will allow the creation of more realistic NO diffusion models that may give insight  
378 into the heterogeneity of neurovascular coupling across brain-regions<sup>187-190</sup>.

379 Our simulations show that NO degradation dynamics by the blood can provide a  
380 mechanism for many experimental observations of cerebrovascular dynamics<sup>16-</sup>  
381 <sup>18,131,134,135,154,166,170,181,191</sup>. The combination of genetically-encoded cGMP sensors<sup>192,193</sup>  
382 combined with optogenetic stimulation nNOS-expressing neurons<sup>194</sup> should allow the  
383 ideas presented here to be examined experimentally. Importantly, our simulations also  
384 suggest that hemodynamic signals in the brain do not solely depend on neural activity,  
385 but rather can be greatly modulated by normal and pathological variations in the  
386 composition of blood.

387

388

389

390

391

## 392 **Methods**

393 Simulations were performed in COMSOL (COMSOL Multiphysics: partial  
394 differential equations (pde) module version 5.2, Burlington MA), with a LiveLink to Matlab  
395 (version R2018b, Mathworks, Natick MA) to provide control of dynamic variables.  
396 Simulation outputs were analyzed in Matlab. A 400  $\mu\text{m}$  long penetrating arteriole was  
397 modeled in the center of a 100  $\mu\text{m}$  radius cylinder of parenchymal tissue with a zero flux  
398 boundary condition. Calculations were simplified by taking advantage of radial symmetry  
399 and assuming no concentration gradients in the circumferential ( $\theta$ ) direction. Axial  
400 gradients of NO did not play a role unless convection was considered. All domains were  
401 assumed to have homogenous properties.

### 402 Overview of model formulation and governing equations

403 In addition to diffusive movement of NO, the flow of blood could add a convective  
404 component to the movement of NO. To determine whether convection of NO driven by  
405 the flow of blood plays an appreciable role in NO dynamics, we simulated fluid flow in the  
406 vessel lumen in a full 3-D model and examined the impact of blood movement on NO  
407 concentration in the smooth muscle (**Figure 2–figure supplement 1**). For flows in the  
408 physiological range, there was negligible effect of blood flow on the NO concentration in  
409 the smooth muscle. This result is consistent with the high Damkohler number (ratio of  
410 diffusion to convection) calculated in previous models of NO diffusion<sup>75,99,112</sup>. This  
411 allowed us to simplify our model for further simulations by assuming a negligible effect of  
412 convection on NO diffusion and not simultaneously model blood velocity profiles. Note  
413 that the COMSOL files also contain the ability to include convective flow calculations by

414 specifying a non-zero pressure difference if desired (parameter: press1 [Torr]) (see data  
415 availability).

416 To investigate how NO scavenging by the blood sculpt's hemodynamic responses  
417 we modeled the interaction at the level of a penetrating arteriole supplying blood to a  
418 region of the parenchyma (**Figure 1**). NO production rates in the parenchyma and  
419 degradation rates in the blood (**Table 1**) were used in a diffusion model to predict the  
420 hemodynamic response using the quantity of NO reaching the smooth muscle (**Figure**  
421 **2C**). We generated a finite element model with this cylindrical geometry in COMSOL.  
422 The finite element model was divided into five domains: a red blood cell-containing 'core'  
423 (RBC core), a cell free layer, an endothelial cell layer, a smooth muscle layer, and  
424 parenchymal tissue. Each domain had their respective rate of production or degradation  
425 of NO (**Table 1**). NO was free to diffuse according to Fick's law.

$$426 \quad \frac{d[NO]}{dt} = D_{NO} \nabla^2 [NO] + R_x(t) \quad \text{Eq. 1}$$

427 Where [NO] is the concentration of NO at any given point in space,  $D_{NO}$  is the diffusion  
428 coefficient of NO ( $3300 \mu\text{m}^2 \text{s}^{-1}$ )<sup>195</sup>, and  $R_x(t)$  is the time dependent degradation or  
429 production rate of NO unique to each domain (**Figure 1D, Table 1**).

430 Perivascular oxygenation was estimated using the Krogh model or Fick's diffusion  
431 equation with oxygen. Luminal oxygen concentration was set to 65 mmHg<sup>120-123</sup> and  
432 oxygen in the parenchymal tissue set to have a lower bound of 10 mmHg<sup>121</sup>. The Krogh  
433 model is a solution to radially symmetric oxygen diffusion from a cylinder (blood vessel)  
434 at steady state<sup>196</sup>, and is given by the equation:

$$435 \quad P_{O_2}(r) = P_{O_2 \text{ artery}} + \frac{\rho}{4\varepsilon D_{O_2}} (r^2 - R^2) - \frac{\rho}{2\varepsilon D_{O_2}} R_t^2 \ln\left(\frac{r}{R}\right) \quad \text{Eq. 2}$$

436 Where  $P_{O_2 \text{ artery}}$  is arteriole oxygen content in mmHg,  $D_{O_2}$  is the diffusion coefficient of  
437 oxygen in water ( $4000 \mu\text{m}^2 \text{s}^{-1}$ )<sup>197,198</sup>,  $r$  is the distance from the arteriole,  $R$  is the radius  
438 of the arteriole,  $R_t$  is the diameter of the tissue cylinder ( $100 \mu\text{m}$ ),  $\epsilon$  is the tissue oxygen  
439 permeability ( $\epsilon = 1.39 \mu\text{M mmHg}^{-1}$ ), and  $\rho$  is the cellular metabolic rate of oxygen  
440 consumption ( $\text{CMRO}_2$ ) in the parenchyma, taken to be  $3 \mu\text{mole cm}^{-3} \text{min}^{-1}$ , as  $\text{CMRO}_2$  in  
441 the awake state is double that under anesthesia<sup>197,199,200</sup>. For simulations where oxygen  
442 levels change rapidly (**Figure 7**), we explicitly modelled the diffusion of oxygen from the  
443 lumen into the parenchyma with Fick's equation:

444 
$$\frac{d[O_2]}{dt} = D_{O_2} \nabla^2 [O_2] - \rho \quad \text{Eq. 3}$$

445 Where  $[O_2]$  is the concentration of oxygen at any given point in space. The average  
446 distance to the nearest penetrating artery from any point in the parenchyma is of order  
447  $100 \mu\text{m}$ <sup>110,201</sup>, so we modeled NO and oxygen diffusion into the parenchyma up to  $100$   
448  $\mu\text{m}$  from the arteriole with a repeating boundary condition (see Methods: Parenchyma).  
449 The model was initiated at steady state ( $\frac{d[NO]}{dt} = 0$ ) before implementing time-dependent  
450 changes in NO production,  $R_x(t)$ . While there is disagreement as to the levels of NO in  
451 the brain<sup>54</sup>, the NO concentration dependence of guanylyl cyclase activity is relatively well  
452 characterized<sup>67,184</sup> and can be used to estimate the extent of vasodilation (see Methods:  
453 Smooth Muscle).

#### 454 Red Blood Cell core

455 Red blood cells (RBCs) are not distributed homogeneously in the vessel, they  
456 cluster in the center (core) of the vessel and are excluded from the volume close to the  
457 endothelial cells<sup>81,202,203</sup>. NO entering the RBC core region is heavily scavenged by the  
458 hemoglobin contained in RBC. The rate of NO scavenging by the RBCs was obtained by

459 multiplying the rate of NO and RBC hemoglobin interaction ( $k_{RBC\ Hb} = 1.4 \cdot 10^5\ M^{-1}s^{-1}$ )<sup>78,144</sup>  
460 with the hemoglobin concentration in a single RBC (20.3 mM), and the core hematocrit<sup>78</sup>  
461 was taken to be 0.45 unless otherwise specified. Additionally, free hemoglobin in the  
462 plasma occupying the spaces between the RBCs can also contribute to NO scavenging.  
463 Free hemoglobin is limited in the plasma (~1  $\mu$ M) compared to hemoglobin contained in  
464 RBCs, but has a much higher reaction rate with NO ( $k_{CFL\ Hb} = 5.8 \cdot 10^7\ M^{-1}s^{-1}$ )<sup>204</sup>. The  
465 plasma component of NO degradation in the RBC core was calculated by multiplying the  
466 fraction of plasma (1-Hct) with the rate of NO and hemoglobin interaction in the plasma  
467 ( $k_{CFL\ Hb}$ ), and the concentration of hemoglobin in the plasma which is modulated in the  
468 model to be 1, 20, or 40  $\mu$ M. The total degradation rate of NO in the RBC core was  
469 assumed to be homogeneous, and was taken to be the sum of the scavenging from RBCs  
470 and plasma components:

$$471 \quad R_{RBC\ core} = -k_{RBC\ Hb}Hct[NO][Hb_{RBC}] - k_{CFL\ Hb}(1 - Hct)[NO][Hb_{CFL}] \quad \text{Eq. 4}$$

472 Detailed equations and parameters can be found in Table 1.

### 473 Cell Free Layer

474 The cell free layer (CFL) is a layer of blood plasma between the RBC core and  
475 endothelial cells. The CFL influences NO signaling by providing a region of reduced NO  
476 degradation that increases the concentration of NO in the smooth muscle<sup>156,203,205</sup>. The  
477 thickness of the CFL can be accurately predicted given a known vessel size and blood  
478 hematocrit<sup>80</sup>. For 10 – 50  $\mu$ m arterioles, the CFL thickness is a quantitative function of  
479 vessel diameter and hematocrit<sup>80,79</sup>. The scavenging rate of NO in the cell free layer is  
480 the product of the rate of NO and hemoglobin interaction in the plasma ( $k_{CFL\ Hb} = 5.8 \cdot 10^7$   
481  $M^{-1}s^{-1}$ )<sup>204</sup>:

482 
$$R_{CFL} = -k_{CFL Hb}[NO][Hb_{CFL}] \quad \text{Eq. 5}$$

483 The concentration of plasma free hemoglobin ( $[Hb_{CFL}]$ ) in the CFL was modulated in the  
484 model to be 1, 20, or 40  $\mu\text{M}$ . Detailed equations and parameters can be found in Table 1.

485 Endothelial cell layer

486 NO is not only produced from nNOS in the parenchyma but also from eNOS  
487 contained in endothelial cells. The contribution of NO from the endothelial cell layer is  
488 thought to be much smaller than parenchymal sources<sup>78,206</sup>, but was still accounted for in  
489 the model by assuming a constant production rate of  $55 \cdot 10^{-3} \mu\text{M s}^{-1}$  in the 1  $\mu\text{m}$  thick  
490 ring between the lumen and smooth muscle<sup>100</sup>.

491 Smooth muscle

492 Upon entering the smooth muscle, NO activates guanylyl cyclase (GC) to induce  
493 vasodilation via increased cGMP production<sup>50,53,207</sup>. The relationship between NO  
494 concentration and GC activation or vessel relaxation can be described by the Hill equation  
495 with a NO half-maximal excitatory concentration ( $EC_{50}$ ) between 3 and 10 nM and a Hill  
496 coefficient near 1<sup>50,184,208,209</sup>. For our model, we used an  $EC_{50}$  of 8.9 nM and a Hill  
497 coefficient of  $n = 0.8$ <sup>50,184,209</sup> to calculate the activity of  $GC_f$  as a function of the average  
498 concentration of NO in the smooth muscle,  $[NO]$ :

499 
$$GC_f([NO]) = \frac{GC([NO])}{GC_{max}} = \frac{[NO]^n}{(EC_{50})^n + [NO]^n} \quad \text{Eq. 6}$$

500 The sensitivity of an arteriole to NO can be modulated<sup>127,209</sup>. In order to account  
501 for an arteriole's ability to become sensitized or desensitized to NO, we kept changes in  
502 vessel size relatively low ( $\pm 5\%$ ) when investigating vasodynamic properties and assumed  
503 a linear relationship between GC activation and vasodilation within this range. The slope

504 of the relationship between GC activation and vasodilation was denoted by the variable  
505  $m \left( \frac{\Delta \text{dilation, \%}}{\Delta \text{GC activation, \%}} \right)$  which was varied between 1 and 5 in our model.

506 The dilatory response following brief sensory stimuli usually peak after 1 - 2  
507 seconds<sup>1,131,133,210</sup> and can be mathematically described by the convolution of the  
508 hemodynamic response function (HRF) with the stimulus. The HRF is typically modeled  
509 by fitting with a gamma distribution function<sup>14,211</sup>. In some cases, in order to capture the  
510 post-stimulus undershoot the HRF is modeled as a sum of two gamma distributions, a  
511 positive one with an early peak to capture the stimulus-induced dilation, and a slower  
512 negative one to generate a post-stimulus undershoot<sup>14,212</sup>. Because NO is a vasodilator  
513 and increases in GC activation are accompanied with increases in vessel diameter, we  
514 modeled the response of the vessel to NO using a single gamma function matched only  
515 to the positive component of the HRFs observed *in vivo*<sup>131</sup>:

516 
$$h(t) = A \left( \frac{t^{\alpha_1 - 1} \beta^{\alpha_1} e^{-\beta t}}{\Gamma(\alpha_1)} \right) \quad \text{Eq. 7}$$

517 Where  $\alpha_1 = 4.5$ ,  $\beta_1 = 2.5$ ,  $t$  is time and  $A$  is the amplitude which was normalized such that  
518  $\int_0^\infty h(t) = 1$ . The predicted diameter was calculated in Matlab and transmitted to  
519 COMSOL with Matlab Livelink to dynamically adjust vessel diameter (**Figure 4–figure**  
520 **supplement 1**):

521 
$$\Delta \text{diameter}(t) = m \int_{\tau=0}^{\infty} d\tau (h(\tau) GC_f([NO(t - \tau)]) - \varphi) \quad \text{Eq. 8}$$

522 The fractional change in diameter of the arteriole was the deviation of the convolution of  
523 the HRF (**Eq. 7**) and past fractional GC activity (**Eq. 6**) from its initial state ( $\varphi =$   
524  $GC_f([EC_{50}])$ ) multiplied by the sensitivity of the arteriole to NO ( $m \frac{\Delta \text{dilation, \%}}{\Delta \text{GC activation, \%}}$ ). This  
525 convolution was performed at each time step so that COMSOL could recalculate Fick's



526 diffusion equation given the new vascular diameter. Because a larger arteriole will supply  
527 more hemoglobin which scavenges more NO this created a dynamic model in which  
528 vasodilation was linked to changing NO degradation via a changing vessel diameter.

### 529 Parenchyma

530 NO is both produced and degraded in the parenchyma, although the rate of NO  
531 degradation within this region is much lower than the degradation rate of NO in the lumen.  
532 NO diffusion into the parenchyma was modeled with a reflecting (no flux) boundary  
533 condition at the radial boundaries of the simulated domain. Parenchymal NO production  
534 was geometrically varied between three models: uniform, regional, and proximal. In the  
535 uniform model, NO production was produced equally within the parenchymal domain. In  
536 the regional model, NO production within 50  $\mu\text{m}$  was set to be 3.8 fold greater than the  
537 tissue further than 50  $\mu\text{m}$  to mimic the increased perivascular density of nNOS neurons  
538 close to the vessel<sup>32</sup>. In the proximal model, all NO production in the parenchyma was  
539 restricted to within 2  $\mu\text{m}$  of the arteriole wall. NO degradation in the parenchyma was  
540 dependent on the NO, oxygen, and cell concentration and expressed using the following  
541 equation<sup>73</sup>:

$$542 \quad R_{parenchyma} = k_{O_2}[O_2][NO][Cell] \quad \text{Eq. 9}$$

543 Where  $k_{O_2} = 5.38 \cdot 10^{-10} \text{ M}^{-1}\text{s}^{-1}(\text{cell/ml})^{-1}$  (**Table 1**) and the density of cellular sinks in the  
544 tissue ( $[Cell]$ ) was chosen to be  $10^8 \text{ cell/ml}$ , as was previously used for NO diffusion  
545 modeling in parenchymal tissue<sup>206</sup>. Note that the degradation rate of NO in the  
546 parenchyma was not uniform throughout the tissue because the oxygen content of the  
547 parenchyma changes with distance from the arteriole. Because the rate of NO  
548 degradation is proportional to the oxygen content of the tissue (**Eq. 9**), the oxygen rich

549 region of the parenchyma near the arteriole will have a higher degradation rate of NO  
550 than distant from the arteriole where the oxygen concentrations fall off. For all of the  
551 simulations presented with the exception of those in Figure 7, the oxygen concentrations  
552 changed slowly enough in time that they could be assumed to be at steady state. This  
553 allowed us to use the Krogh model, as it gave oxygen profiles identical to full simulations  
554 of diffusion of oxygen using Fick's equations with little computational overhead. However,  
555 for simulations where rapid and large manipulations of oxygen tension were performed  
556 (**Figure 7**), we simulated the diffusion and consumption of oxygen in the parenchyma  
557 (**Eq. 3**). Within the NO producing region of the parenchyma, NO production/degradation  
558 was accounted for with a production rate  $P_{NO}(t)$ .

559 
$$R_{parenchyma}(t) = P_{NO}(t) - k_{O_2}[O_2][NO][Cell] \quad \text{Eq. 10}$$

560 For steady-state simulations,  $P_{NO}(t)$  was a constant production rate that was  
561 parametrically varied. For time-dependent simulations,  $P_{NO}(t)$  was modified to be a pulse  
562 of increased NO production or white noise centered around the  $EC_{50}$  for guanylyl cyclase  
563 activity (8.9 nM).

#### 564 Simulating diffusion in a deforming domain

565 The deformation of the RBC core and the cell free layer during vasodilation and  
566 constriction were modeled with a linear displacement of the finite element mesh. The  
567 deformation of the parenchymal tissue, smooth muscle, and endothelial cell layer was  
568 modeled by linear elasticity<sup>213</sup> with a Poisson ratio of 0.45. The spatial gradients in the  
569 diffusion equation in all the domains were transformed into gradients in deforming  
570 domains using the arbitrary Lagrangian-Eulerian (ALE) method<sup>214</sup>. The total parenchymal  
571 NO production rate was held constant during the slight deformation of the surrounding

572 tissue due to changes in arteriole diameter. Because the smooth muscle was modeled as  
573 nearly incompressible and its cross-sectional area did not appreciably change,  
574 vasodilation reduced its thickness such that the distal boundary of the smooth muscle  
575 became closer to the lumen. Vasodilation also displaced the tissue radially outward and  
576 the displacement was taken into account when comparing points in the tissue at different  
577 dilation states.

### 578 Power Spectrum Calculation

579 We investigated the preferred frequency of vasodynamics in the model by  
580 introducing a white Gaussian noise production rate of NO (30 Hz, low pass filtered < 2  
581 Hz, 25 minute duration) in the parenchyma within 2  $\mu\text{m}$  of the arteriole wall (proximal  
582 model). NO production was initially set such that GC activity in the smooth muscle was at  
583  $\text{EC}_{50}$  (8.9 nM) and the variance from a white Gaussian noise change in NO production  
584 was chosen such that there was no change in vessel diameter exceeding  $\pm 5\%$ . Vessel  
585 sensitivity was set to  $m = 4 \left( \frac{\text{dilation, \%}}{\text{gc, \%}} \right)$  unless otherwise indicated. The power spectral  
586 density was calculated from the arteriole response in the model using the Chronux toolbox  
587 version 2.11 (<http://chronux.org>, function: mtspectrumc). We used 101 averages for a  
588 frequency resolution of 0.067 Hz.

### 589 Calculation of the hemodynamic response function

590 The relationship between neural activity and vessel dynamics is often considered  
591 a linear time-invariant (LTI) system<sup>211,215,216</sup> which allows for the hemodynamic response  
592 function to be calculated numerically using the relationship

$$593 \quad H_{(k+1) \times 1} = (T^T T)^{-1} T^T V_{(q+k) \times 1} \quad \text{Eq. 11}$$

594 Where H is the HRF, V is the vascular response, and T is a Toeplitz matrix of size (q+k)  
 595 × (k+1), containing measurements of normalized neural activity (n)<sup>131</sup>.

$$596 \quad T(\vec{n}) = \begin{pmatrix} 1 & n_1 & 0 & 0 & \cdots & 0 \\ 1 & n_2 & n_1 & 0 & \cdots & 0 \\ \vdots & \vdots & n_2 & n_1 & \cdots & \vdots \\ \vdots & n_k & \vdots & n_2 & \cdots & n_1 \\ \vdots & 0 & n_k & \vdots & \cdots & n_2 \\ \vdots & \vdots & \vdots & n_k & \ddots & \vdots \\ 1 & 0 & 0 & 0 & \cdots & n_k \end{pmatrix} \quad \text{Eq. 12}$$

597 Note that this method makes no assumptions about the shape of the HRF. To evaluate  
 598 the HRF produced in the model we performed the same calculation using a NO production  
 599 rate (n) in place of neural activity, where n was white Gaussian noise.

#### 600 Estimating perivascular mitochondrial inhibition

601 Although NO dilates arteries, resulting in increased blood flow and O<sub>2</sub> delivery to  
 602 the tissue, it can also compete with O<sub>2</sub> at the mitochondrial cytochrome c oxidase (CcO)  
 603 to inhibit aerobic respiration and facilitate the generation of free radicals<sup>183,217</sup>. Under  
 604 physiologic conditions, inhibition of CcO by NO is minimal and reversible<sup>56,218–220</sup> but  
 605 under conditions of high NO and/or low O<sub>2</sub>, CcO can be permanently inhibited<sup>119</sup>.  
 606 Permanent inhibition of CcO occurs at nominal NO and O<sub>2</sub> concentrations of 1000 nM  
 607 and 130 μM, respectively<sup>119</sup> which is equivalent to 12.5% CcO activity using a competitive  
 608 model of inhibition:

$$609 \quad V_{O_2} = \frac{[O_2]}{[O_2] + \zeta_{O_2} \left(1 + \frac{[NO]}{\zeta_{NO}}\right)} \quad \text{Eq. 13}$$

610 Here, V<sub>O<sub>2</sub></sub> is the fractional activity of CcO, ζ<sub>O<sub>2</sub></sub> = 210, ζ<sub>NO</sub> = 0.225, and [O<sub>2</sub>] and [NO] are  
 611 the respective oxygen and NO concentrations, expressed in nM<sup>54,217,218</sup>. Because  
 612 permanent inhibition of CcO is likely pathological (V<sub>O<sub>2</sub></sub> ≤ 12.5%), it is unlikely that  
 613 physiological NO-mediated NVC produces this combination of NO and O<sub>2</sub> concentrations.

614 **Data Availability:** Code used to generate the figures in this paper is available at:

615 <https://psu.box.com/v/Haselden-NO-Code>

616

617 **Acknowledgements**

618 This work was supported by R01EB021703 from the NIH to PJD. We thank Y. Kim and

619 Y-T Wu for providing images of the brain vasculature in Figure 1.

620

621

622

623

624

625

626

627

628

629

630

631

632

633 **Table 1. Simulation Parameters**

| <b>Geometry Variable</b>      | <b>Value</b>                                                                                          | <b>Ref</b>       |
|-------------------------------|-------------------------------------------------------------------------------------------------------|------------------|
| $R_{vessel}$                  | 5 – 25 $\mu\text{m}$                                                                                  |                  |
| $R_{CFL}$                     | 1.5 – 4.3 $\mu\text{m}$                                                                               | 80               |
| $R_{nNOS}$                    | 2 $\mu\text{m}$ (proximal)<br>50 $\mu\text{m}$ (regional)<br>N/A (uniform)                            | 32,114,115<br>32 |
| <b>Domains</b>                |                                                                                                       | <b>R</b>         |
| <b>RBC Core</b>               | $-k_{RBC\ Hb}Hct[NO][Hb_{RBC}] - k_{CFL\ Hb}(1 - Hct)[NO][Hb_{CFL}]$                                  |                  |
| <b>Cell Free Layer</b>        | $-k_{Hb_{CFL}}[NO][Hb_{CFL}]$                                                                         |                  |
| <b>Endothelial Cell Layer</b> | $55 \cdot 10^{-3} \mu\text{M}\text{s}^{-1}$                                                           | 100              |
| <b>Smooth Muscle</b>          | N/A                                                                                                   |                  |
| <b>Parenchyma</b>             | $P_{NO} - k_{O_2}[O_2][NO][Cell]$                                                                     | 73               |
| <b>Constants</b>              |                                                                                                       | <b>Value</b>     |
| $Hct$                         | 0.45                                                                                                  | text             |
| $Cell$                        | $10^8 \text{ cells ml}^{-1}$                                                                          | 221              |
| $Hb_{RBC}$                    | 20.3 mM                                                                                               | text             |
| $Hb_{CFL}$                    | 1 $\mu\text{M}$ , 20 $\mu\text{M}$ , or 40 $\mu\text{M}$                                              | text             |
| $k_{RBC\ Hb}$                 | $1.4 \cdot 10^5 \text{ M}^{-1}\text{s}^{-1}$                                                          | 78,144           |
| $k_{CFL\ Hb}$                 | $5.8 \cdot 10^7 \text{ M}^{-1}\text{s}^{-1}$                                                          | 204              |
| $k_{O_2}$                     | $5.38 \cdot 10^{-10} \mu\text{M}^{-1}\text{s}^{-1} \left[ \frac{\text{cell}}{\text{ml}} \right]^{-1}$ | 73               |
| $\epsilon$                    | $1.39 \mu\text{M mmHg}^{-1}$                                                                          | 197,198          |
| $D_{NO}$                      | $3300 \mu\text{m}^2 \text{ s}^{-1}$                                                                   | 195              |
| $D_{O_2}$                     | $4000 \mu\text{m}^2 \text{ s}^{-1}$                                                                   | 197,198          |
| $P_{O_2 \text{ artery}}$      | 65 mmHg                                                                                               | 120–123          |
| $\rho$                        | $3 \mu\text{mole cm}^{-3} \text{ min}^{-1}$                                                           | 197,199,200      |
| $R_t$                         | 100 $\mu\text{m}$                                                                                     | 110,201          |
| $EC_{50}$                     | 8.9 nM                                                                                                | 50,184,209       |
| $n$ (Hill coefficient)        | 0.8                                                                                                   | 50,184           |
| $\zeta_{O_2}$                 | 210                                                                                                   | 54,217,218       |
| $\zeta_{NO}$                  | 0.225                                                                                                 | 54,217,218       |

634  
635  
636

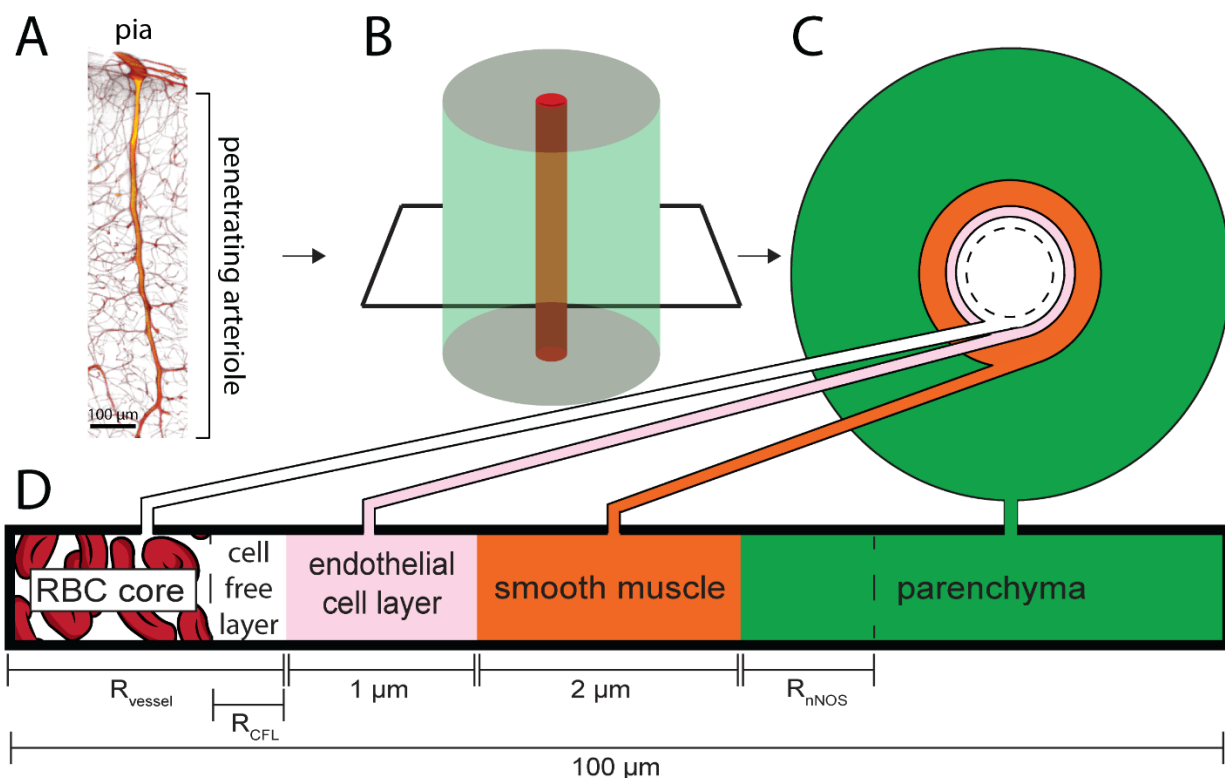

637

638 **Figure 1. Schematic of the model.** A) 3D reconstruction from serial 2-photon  
639 tomography of a penetrating arteriole. Penetrating arterioles are oriented perpendicularly  
640 to the pial surface. B) Simplified geometry used in the simulation where the penetrating  
641 arteriole is modeled as single arteriole surrounded by a cylinder of parenchymal tissue.  
642 C & D) Locations and thicknesses of the tissue domains in the model. At the center are  
643 red blood cells (RBC core). The cell free layer is a thin layer of plasma lacking red blood  
644 cells immediately adjacent the endothelial cell layer. Both the RBC core and the cell-free  
645 layer size are dynamically changed when the vessel dilates or constricts. The endothelial  
646 cells and smooth muscle make up the arterial wall, and the vessel radius is taken to be  
647 the distance from the center of the vessel to the inner wall of the endothelial cells. Outside  
648 the smooth muscle is the parenchyma, composed of neurons, glia and extracellular  
649 space. The simulated tissue cylinder is 100  $\mu\text{m}$  in diameter. The thickness of the NO-  
650 synthesizing portion of the tissue ( $R_{\text{nNOS}}$ ), vessel diameter ( $R_{\text{vessel}}$ ) and the size of the  
651 cell free layer ( $R_{\text{CFL}}$ ) were parametrically varied.

652

653

654

655

656

657

658

659

660

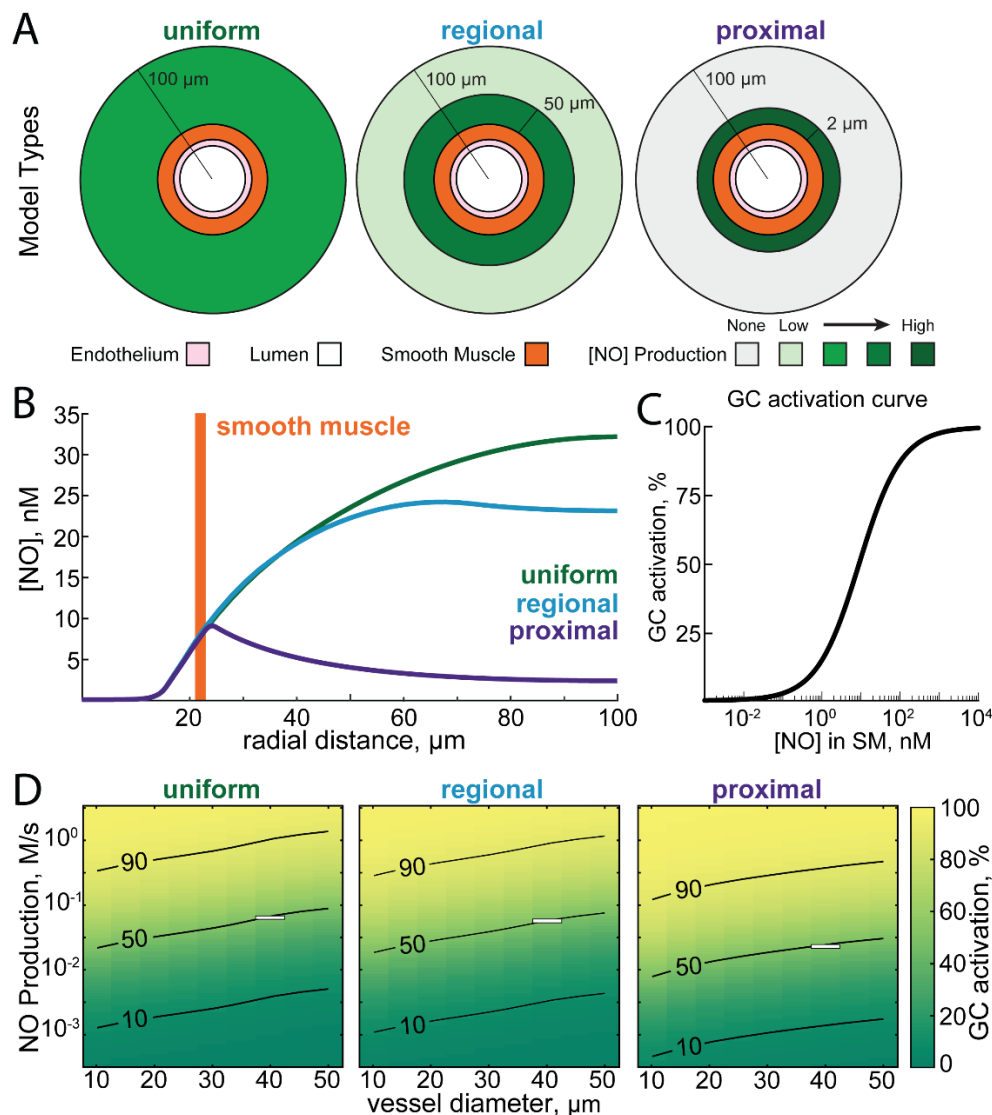

661

662 **Figure 2. Impact of the location of NO production on NO concentration in the**  
 663 **smooth muscle and tissue.** A) Schematic showing the three simulated distributions of  
 664 neuronal NO production relative to the vasculature. In the uniform model, neuronal NO-  
 665 production is uniformly distributed through the parenchyma. In the regional model, there  
 666 is a higher density of neuronal NO production near the vessel (within 50  $\mu\text{m}$ )<sup>32</sup>. In the  
 667 proximal model, all neuronal NO is produced within 2 micrometers of the arterial  
 668 wall<sup>32,114,115</sup>. B) Plot of NO concentrations versus radial distance for each of the three  
 669 models where the production rates have been chosen to yield equal concentration of NO  
 670 in the smooth muscle layer (NO production rate for proximal: 0.02 M/s; regional: 0.05 M/s;  
 671 uniform: 0.056 M/s). Note that the concentration of NO in the parenchyma is very different  
 672 for each of these models. C) Relationship between [NO] in the smooth muscle and  
 673 percent of maximal guanylyl cyclase activity in the model, based on experimental data  
 674 in<sup>50,184,209</sup>. D) Plot showing percent of maximal guanylyl cyclase activation in the smooth  
 675 muscle as a function of the NO production rate and vessel diameter in each of the three  
 676 geometries. Superimposed curves show 10, 50, and 90% of maximal guanylyl cyclase  
 677 activation. White boxes show the NO production rates and vessel diameters shown in B.



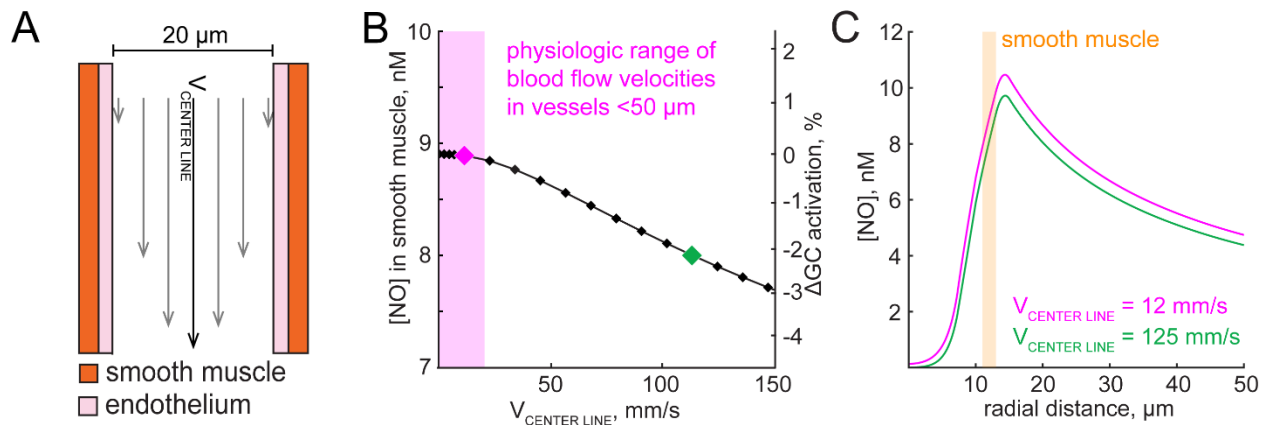

678

679 **Figure 2–figure supplement 1. Convection has a negligible effect on perivascular**  
680 **NO concentrations.** A) Relative velocity profile of blood flowing through an arteriole that  
681 is proportional to convective transport experienced by NO. B) Within physiologic blood  
682 flow velocities in a 20  $\mu\text{m}$  diameter arteriole<sup>222,223</sup>, convection causes a negligible change  
683 in [NO] ( $\Delta 0.1\%$  GC activation). The pink diamond indicates a physiologic flow in a 20  $\mu\text{m}$   
684 diameter arteriole, while the green diamond is approximately tenfold higher, comparable  
685 to the centerline velocity in a 200  $\mu\text{m}$  diameter arteriole<sup>223</sup>. C) Perivascular [NO] profiles  
686 accounting for convection at physiologic (pink) and extreme (green) blood flow velocities.  
687 [NO] profiles when blood flow velocities are less than 20 mm/s is conserved. Pink and  
688 green data diamonds in B are plotted as perivascular [NO] profiles in C.

689

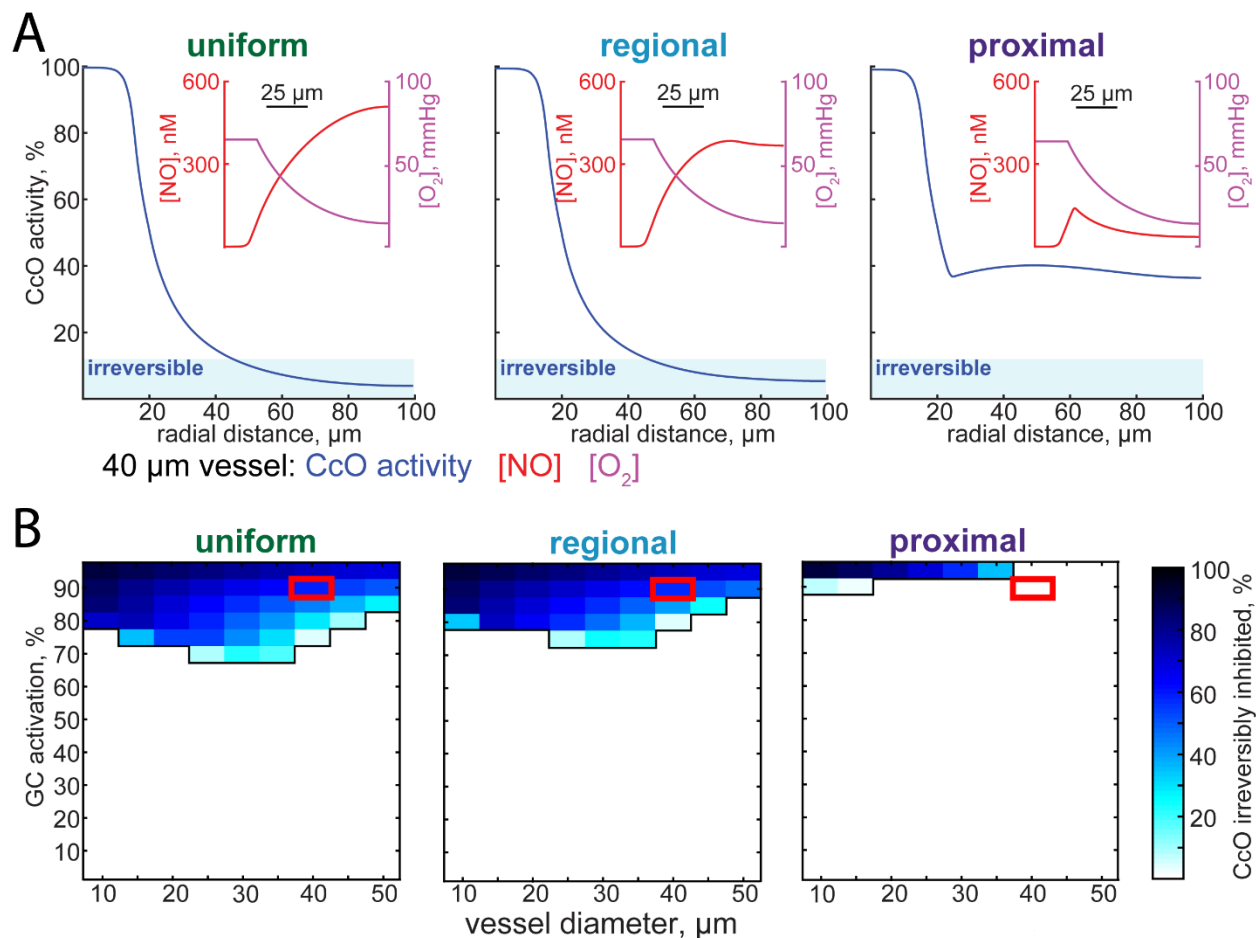

690

691 **Figure 3. Extent of the NO inhibition of mitochondrial respiration depends on the**  
692 **location of NO production.** A) Plots of cytochrome c oxidase (CcO) activity as a function  
693 of radial distance for the uniform, regional, and proximal models. The vessel diameter  
694 was set to 40 micrometers, and NO production rates have been set so that there is 90%  
695 of maximal GC activation in the smooth muscle. When CcO activity drops below 12.5%,  
696 CcO inhibition is irreversible<sup>56</sup>, and this is shown as a shaded region labelled 'irreversible'.  
697 Insets show oxygen and NO concentrations as a function of radial distance. Oxygen  
698 concentration curves match *in vivo* measurements<sup>120,121</sup>. B) The fraction of tissue  
699 irreversibly inhibited as function of various NO production levels and vessel diameters for  
700 each of the three different NO production geometries. Red boxes indicate simulations  
701 plotted in (A). Note that for the regional and uniform NO production geometries, CcO  
702 inhibition becomes an issue at a wider range of NO production levels. For the proximal  
703 production case, inhibition of respiration by NO only occurs at the highest levels of NO  
704 production.

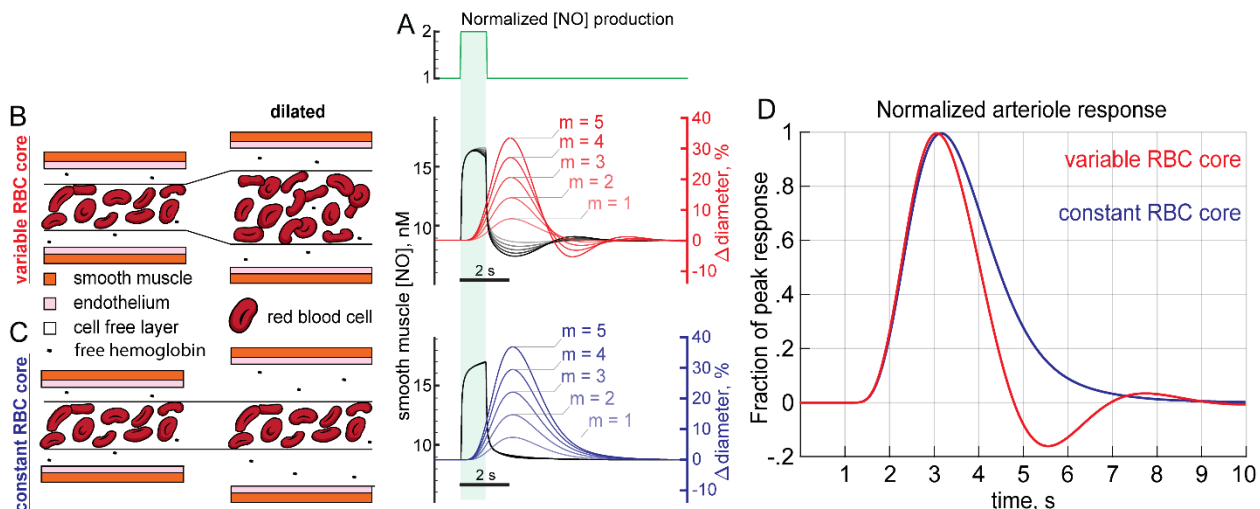

705  
 706 **Figure 4. Dynamical model of NO-induced dilation shows a post-stimulus**  
 707 **undershoot.** A) NO production in the proximal model was increased 100% for 1 second  
 708 in these simulations with a baseline NO production set at  $EC_{50}$  in the smooth muscle. B)  
 709 Arteriole dilation increases the supply of RBCs in the ‘physiologically realistic’ variable  
 710 RBC model. The arteriole dilates (red) in response to increased NO in the smooth muscle  
 711 (black); however, after NO production returns to baseline the arteriole is still dilated. The  
 712 dilated arteriole can accommodate more RBCs which depletes NO below baseline. The  
 713 depletion of NO concentrations below baseline is reflected in a corresponding post-  
 714 stimulus constriction. Five different sensitivities to GC ( $m = 1, 2, 3, 4, 5 \frac{\Delta \text{dilation, \%}}{\Delta \text{GC activation, \%}}$ ) are  
 715 shown. C) Dilation in the constant RBC core case does not increase RBC supply or the  
 716 degradation rate of NO. When vasodilation does not increase NO consumption, NO  
 717 concentrations do not fall below baseline and no post-stimulus constriction occurs. D)  
 718 Dilations for  $m = 5 \frac{\Delta \text{dilation, \%}}{\Delta \text{GC activation, \%}}$  rescaled to the same height showing the relative size  
 719 of the post-stimulus constriction in the variable RBC core case while none is present if  
 720 the RBC core is held constant during vasodilation.

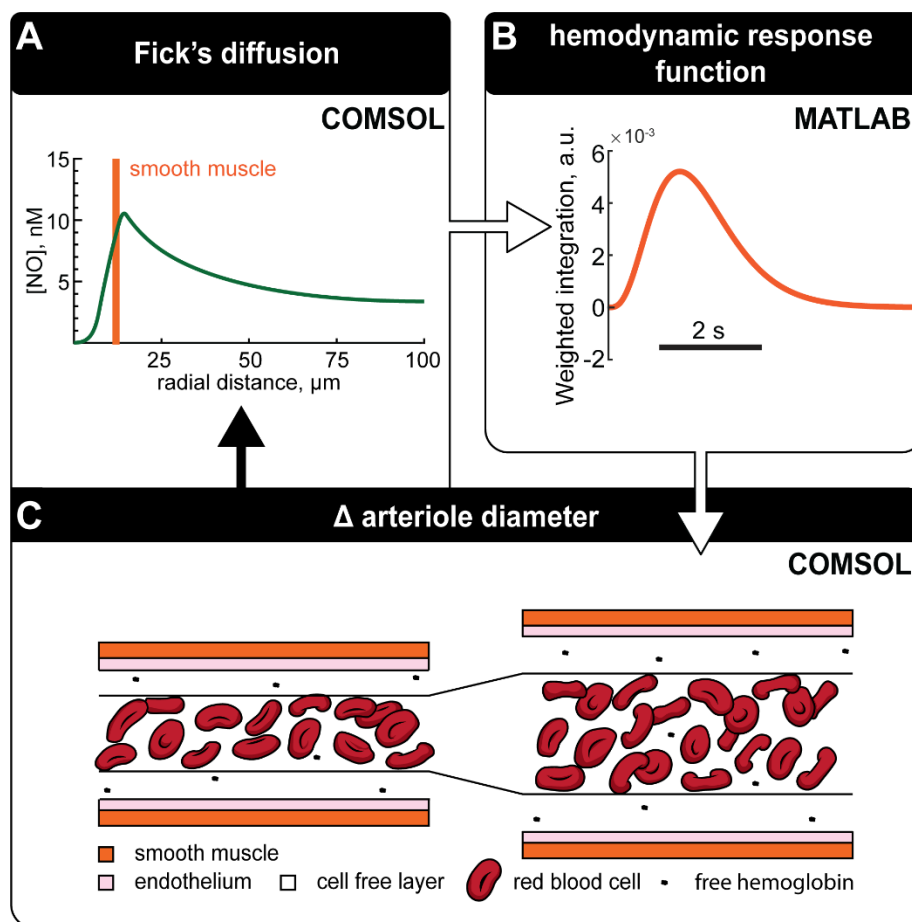

721

722 **Figure 4–figure supplement 1. Coupled diffusion and deformation schematic.** A) NO  
723 gradients surrounding an arteriole is evaluated using Fick's equation. B) The recent  
724 history of NO levels in the smooth muscle domain is converted to GC activation and  
725 convolved with a kernel to account for the signaling cascade that converts GC activation  
726 into dilation. This kernel was chosen to match the temporal dynamics of neurally-evoked  
727 dilation. C) Arteriole diameter is adjusted depending on the output of the kernel with more  
728 or less NO corresponding to dilation and constriction respectively. Diffusion of NO can  
729 then be re-evaluated using the new arteriole geometry. Adjustments to arteriole diameter  
730 using this cycle are made at each time step.

731

732

733

734

735

736

737

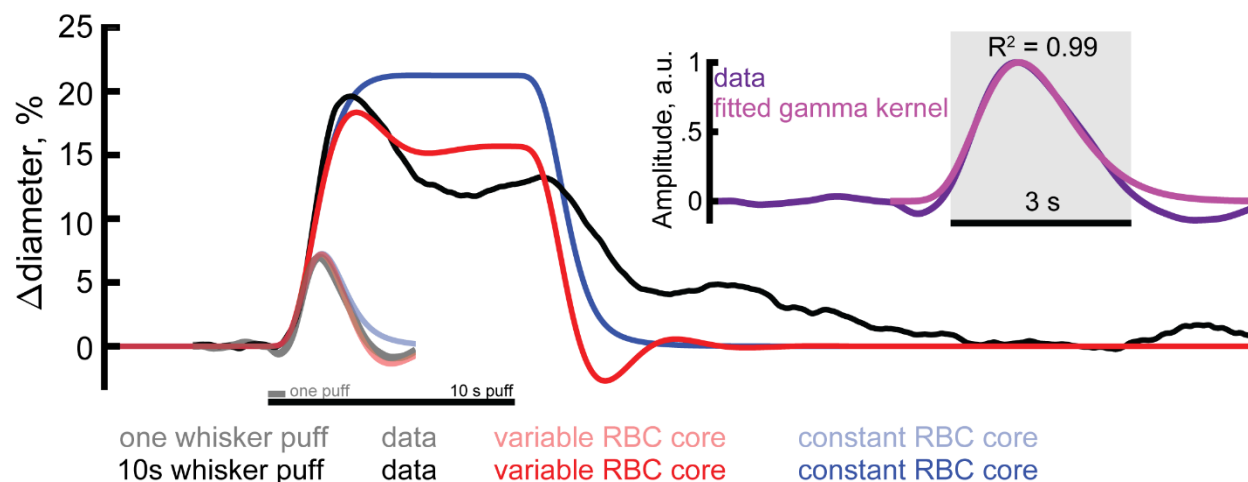

739 **Figure 4–figure supplement 2. Model dynamics of allowing interplay of NO**  
740 **degradation and vasodilation.** *In vivo* mouse surface arteriole diameters in the  
741 somatosensory cortex in response to a single and 10-second-long puff to the whiskers<sup>1</sup>  
742 (black) were compared to the model with a variable RBC core (red) or constant RBC core  
743 (blue). The response kernel of the vessel was fitted to the positive component of the  
744 hemodynamic response function (HRF) from a single whisker puff (inset) and the slope  
745 of vessel sensitivity to NO,  $m$ , was set to 3. Allowing the degradation of NO to dynamically  
746 change with arteriole diameter imposed a post-stimulus undershoot that was not present  
747 when the RBC core diameter was held constant.

748

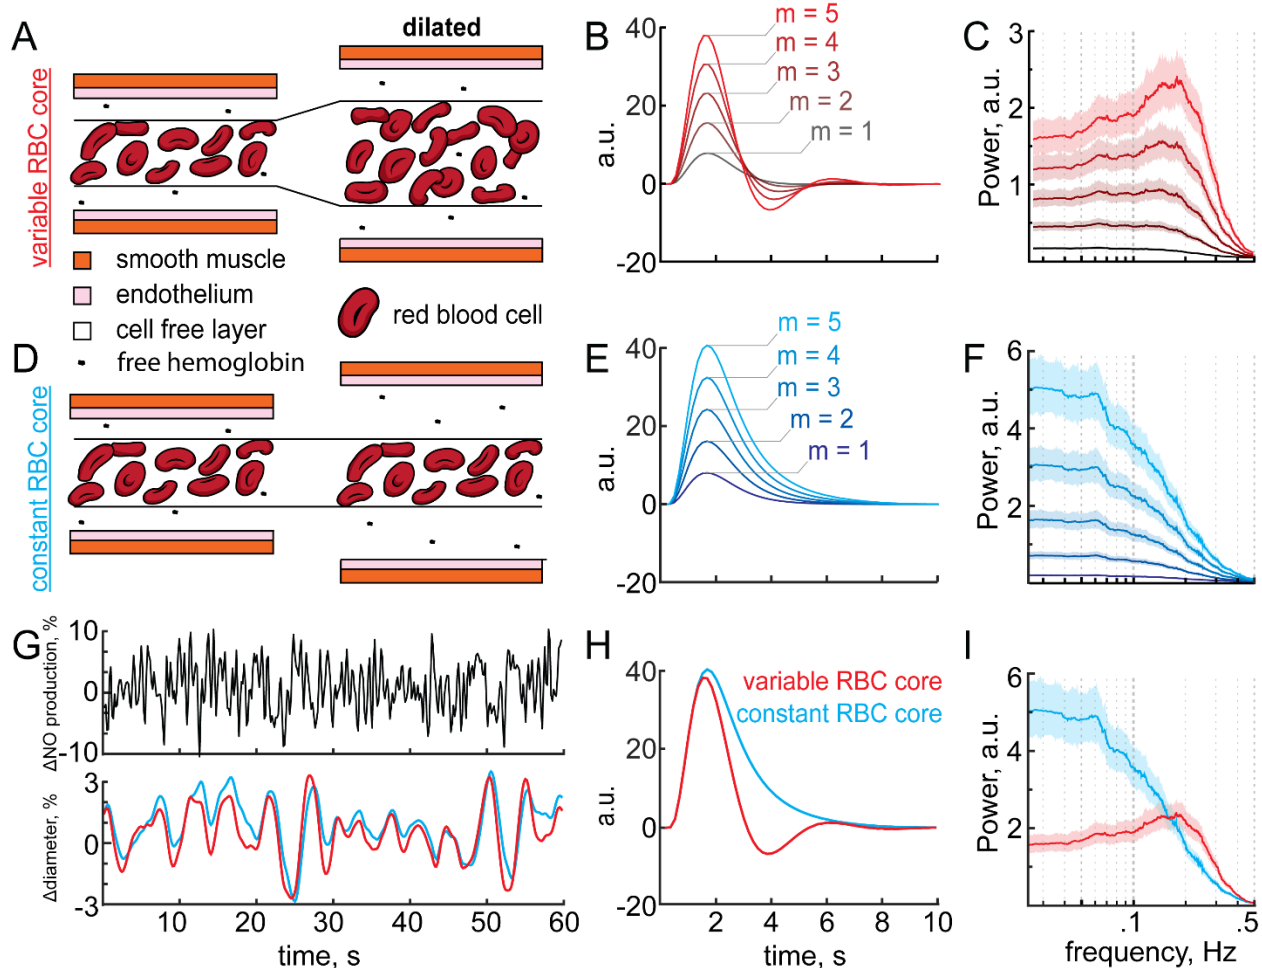

749

750 **Figure 5. Arteriole sensitivity to NO increases the amplitude of the undershoot and**  
 751 **vasomotion.** A) Schematic of the variable RBC core. Vasodilation increases the  
 752 diameter of the RBC core and thus the degradation rate of NO in the variable RBC core  
 753 model. B & C) Hemodynamic response function (B) and power spectrum (C) of the  
 754 variable RBC core model from a white noise NO production rate. Note that with increasing  
 755 NO sensitivity (slope,  $m \frac{\Delta \text{dilation, \%}}{\Delta \text{GC activation, \%}}$ ) the magnitude of the undershoot and power near  
 756 0.2 Hz increases. D) Vasodilation does not increase the diameter of the RBC core and  
 757 thus the degradation rate of NO does not change in the constant RBC model. E & F) No  
 758 post-stimulus undershoot is present (E) and the maximum power of the constant RBC  
 759 core model is at low frequencies (<0.1 Hz) (F). G) 60 second example taken from a 25  
 760 minute trial displaying NO production and resultant diameter changes from which arteriole  
 761 dynamics were evaluated. H & I) Juxtaposition of variable (red) and constant (blue) RBC  
 762 core models for  $m = 5$  showing the post-stimulus constriction (H) and peak power between  
 763 0.1 – 0.3 Hz (I) in the variable RBC core case (red) while no undershoot or peak power  
 764 between 0.1 – 0.3 Hz is present if the RBC is held constant during vasodilation (blue).

765

766

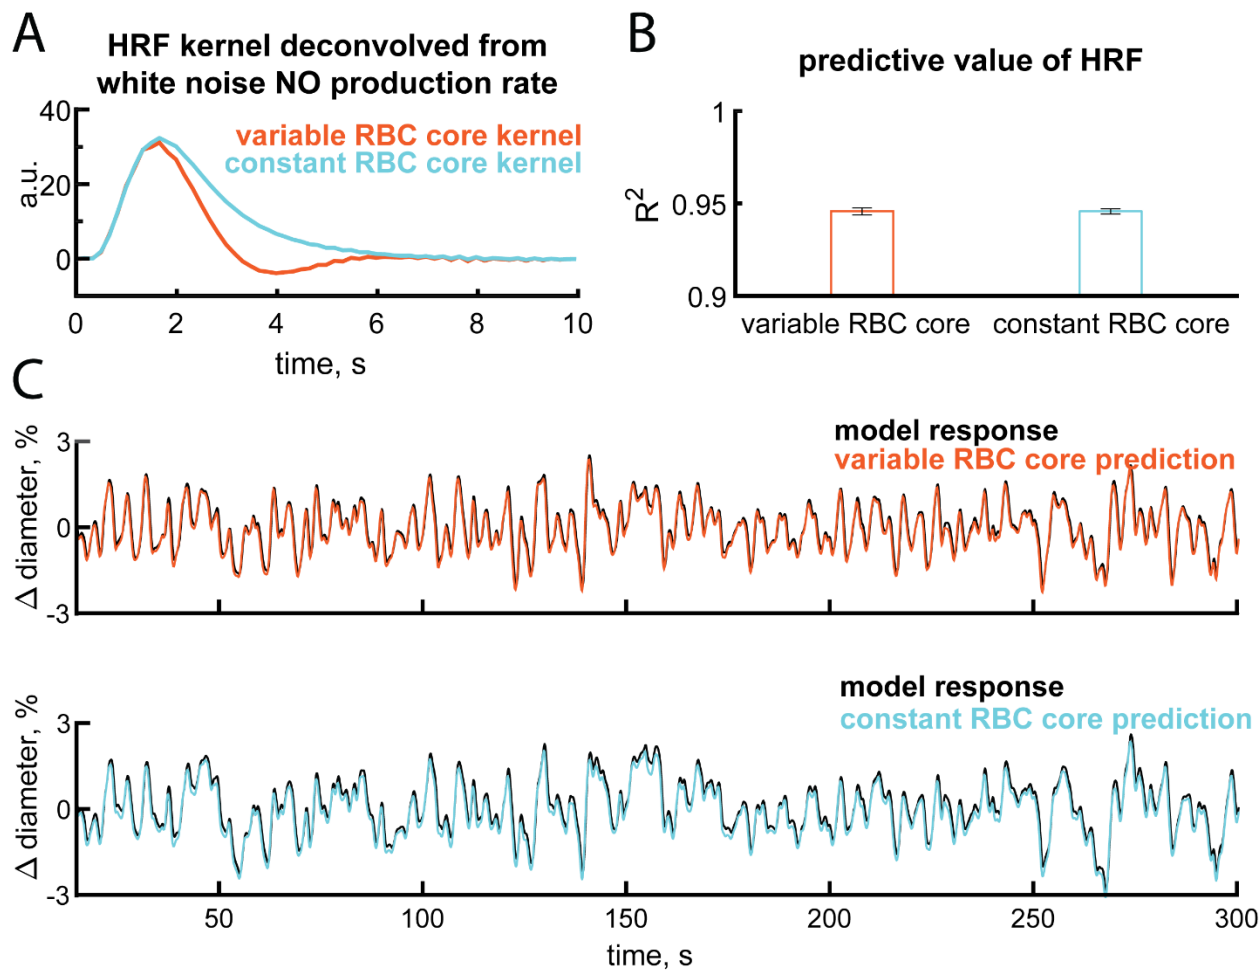

767

768 **Figure 5–figure supplement 1. Coupling NO degradation to vessel size is a linear**  
 769 **system.** A) The variable and constant RBC core model HRF shown is deconvolved from  
 770 12 minutes of white noise NO production when  $m = 4 \frac{\Delta \text{dilation, \%}}{\Delta \text{GC activation, \%}}$ . B) Convolution of  
 771 the NO production rate with the kernel has a high predictive value for estimating the  
 772 arteriole response for the remaining 12 minutes of the trial.  $R^2$  values shown are from  $m = 1, 2, 3, 4,$  and  $5$ . C) Example 300 seconds of data showing the difference between the  
 773 response in the model and an approximation using the kernels shown in A. Example  
 774 shown for  $m = 4$ .  
 775

776

777

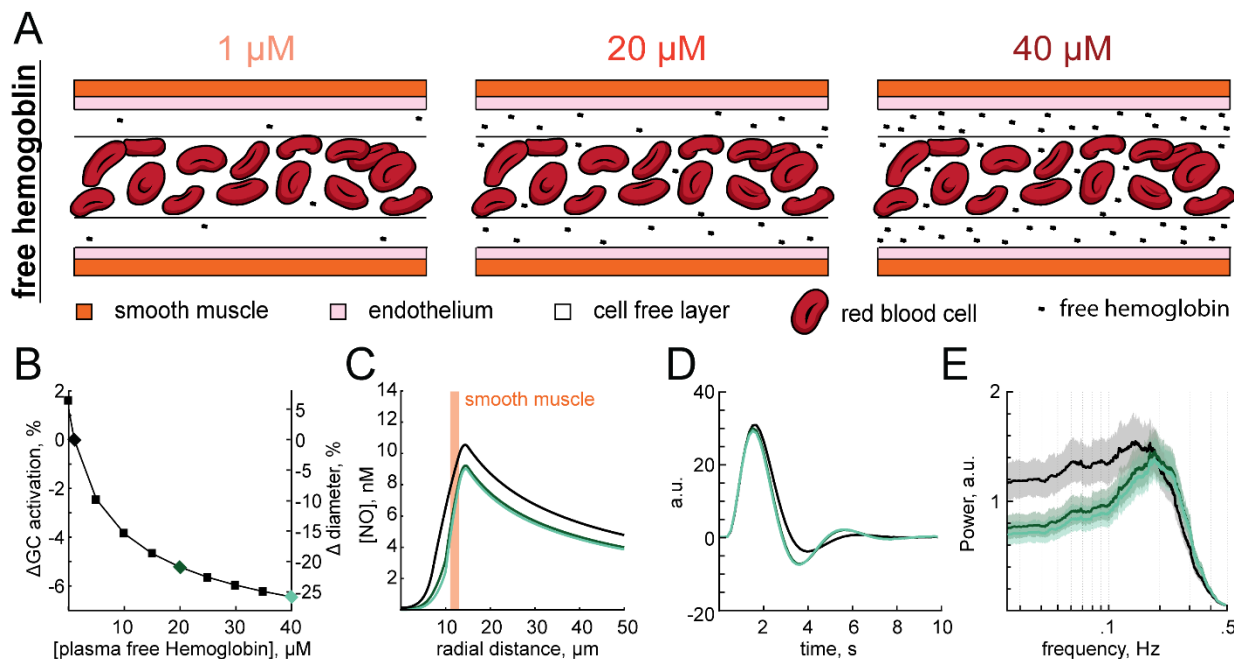

778 plasma free Hemoglobin: 1  $\mu\text{M}$  20  $\mu\text{M}$  40  $\mu\text{M}$

779 **Figure 6. Impact of plasma free hemoglobin on vasodynamics.** A) When hemoglobin  
780 (Hgb) is released into the plasma, the location of NO degradation shifts from the RBC  
781 core to the Hgb rich cell free layer. B) Increasing free Hgb constricts arterioles. The  
782 change in diameter was calculated at steady state after accounting for the change in NO  
783 degradation. Black, dark green and light green diamonds correspond to 1, 20 and 40  $\mu\text{M}$   
784 of plasma hemoglobin respectively with colors interpretations conserved from B to E. C)  
785 The shift in location of NO consumption to the cell free layer and increased reactivity of  
786 free Hgb over RBC Hgb decreases perivascular NO with diminishing returns past 20  $\mu\text{M}$ .  
787 D) Increasing free hemoglobin slightly increases the undershoot in the hemodynamic  
788 response function. E) Increasing free hemoglobin reduces the low frequency power (<0.1  
789 Hz) and strengthens the band pass properties within the 0.1 - 0.3 Hz range.



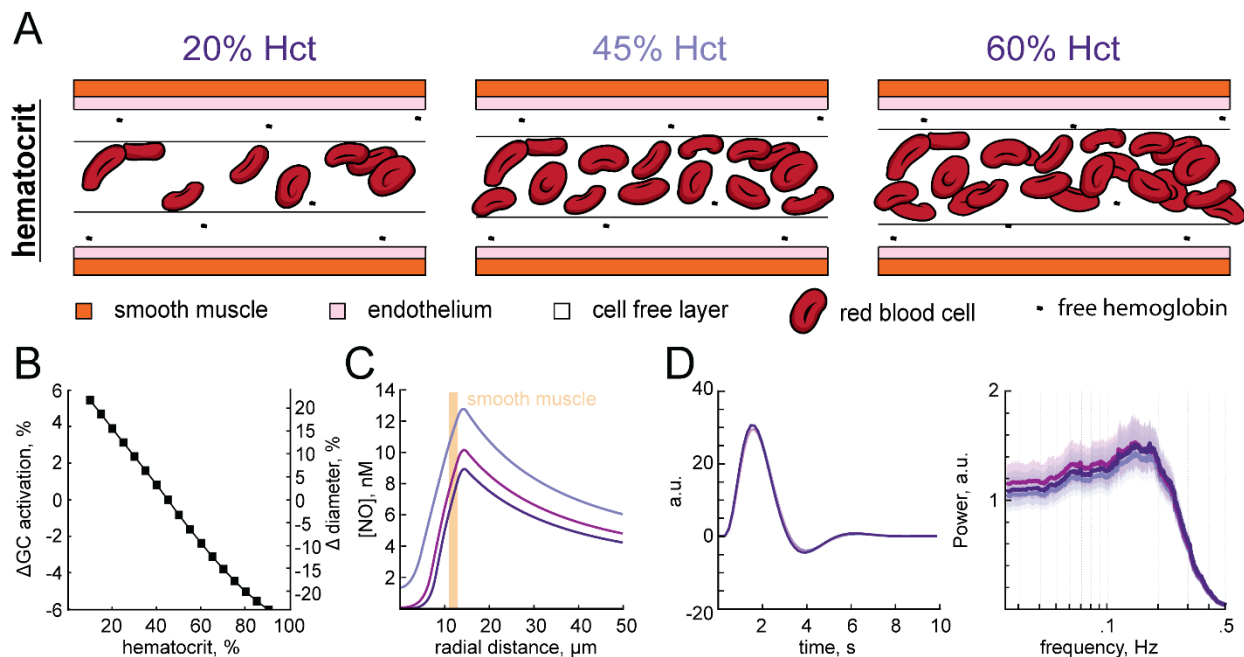

790 Hematocrit: 20% 45% 60%

791 **Figure 6–figure supplement 1. Impact of hematocrit on vasodynamics.** A) Increasing  
792 hematocrit increases the degradation of NO in the RBC core and reduces the size of the  
793 cell free layer. B) Baseline GC activation and arteriole diameter are predicted to decrease  
794 with increasing hematocrit and increase with decreasing hematocrit. C) Perivascular NO  
795 increases with low hematocrit and decreases with elevated hematocrit. The location of  
796 the smooth muscle is indicated in orange. D) Changing hematocrit does not alter the  
797 hemodynamic response function or the frequency response of the vessels (E).

798

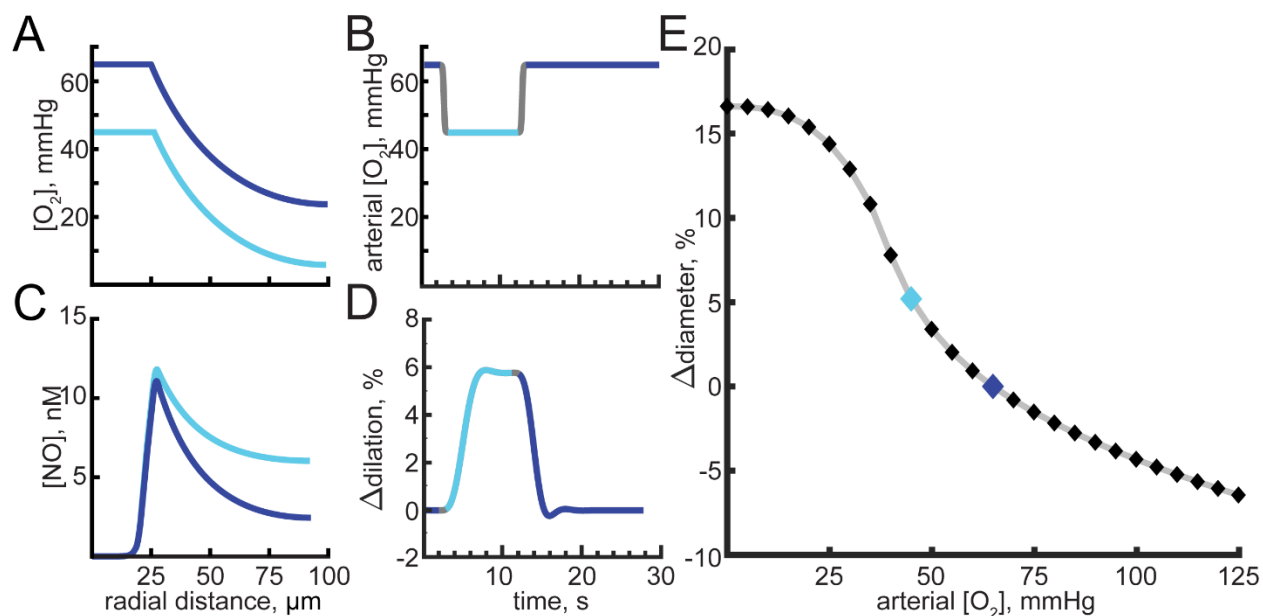

799

800 **Figure 7. Hypoxia and hyperoxia alter NO levels and can drive vasodilation and**  
801 **vasoconstriction.** A) Oxygen concentration as a function of distance from the arteriole  
802 center with a blood oxygen content of 65 mmHg (dark blue) or 45 mmHg (light blue). B)  
803 Time course of arterial simulated oxygen content. The oxygen concentration drops 20  
804 mmHg for 10 seconds before returning back to 65 mmHg. Gray indicates time at which  
805 arteriole oxygen tension is changing and dark blue and light blue indicate arteriole oxygen  
806 content of 65 mmHg or 45 mmHg, respectively. C) Perivascular NO concentrations with  
807 a 65 mmHg (dark blue) and 45 mmHg (light blue) blood oxygen content. D) Arteriole  
808 response from a 10 second 20 mmHg decrease in blood oxygenation shown in (B).  
809 Arteriole sensitivity to NO is set to  $m = 4$ . E) Hypoxia increases arteriole diameter at a  
810 more rapid rate than hyperoxia. Dark and light blue diamonds correspond to blood  
811 oxygenation states shown in (A-D).

812

813

814

815

816

817

818

819

820

821

822

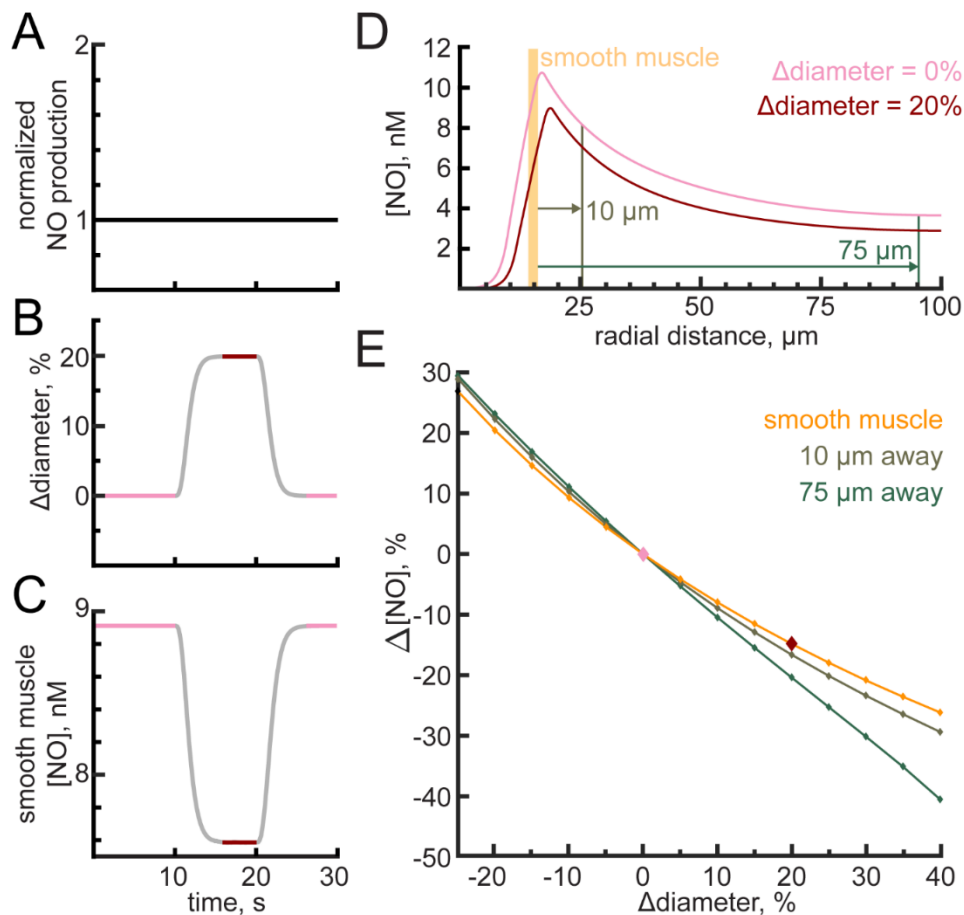

823

824 **Figure 8. Arteriole diameter changes alter perivascular NO.** A) NO production was  
825 held constant. (B) A 20% dilation of the arteriole was externally imposed. Pink indicates  
826 the pre-dilated state while red is the dilated state. Grey indicates transition times in which  
827 steady state has not yet been reached. C) NO concentrations in the smooth muscle  
828 depleted as a result of the increased arteriole diameter. D) The perivascular NO in the  
829 smooth muscle (orange), 10  $\mu\text{m}$  from the arteriole wall (brown), and 75  $\mu\text{m}$  from the  
830 arteriole wall (green) were all decreased following a 20% dilation. The reference position  
831 of the smooth muscle is shown in orange, and parenchymal position markers in brown  
832 and green is for the pre-dilated state. E) Perivascular NO changed during arteriole dilation  
833 and constriction even at distances up to 75  $\mu\text{m}$  from the arteriole wall.

834

835

836

837

838

839

840

## 841 **References**

- 842 1. Drew, P. J., Shih, A. Y. & Kleinfeld, D. Fluctuating and sensory-induced  
843 vasodynamics in rodent cortex extend arteriole capacity. *Proc. Natl. Acad. Sci. U.*  
844 *S. A.* **108**, 8473–8478 (2011).
- 845 2. Gao, Y. R., Greene, S. E. & Drew, P. J. Mechanical restriction of intracortical  
846 vessel dilation by brain tissue sculpts the hemodynamic response. *Neuroimage*  
847 **115**, 162–176 (2015).
- 848 3. Mateo, C., Knutsen, P. M., Tsai, P. S., Shih, A. Y. & Kleinfeld, D. Entrainment of  
849 Arteriole Vasomotor Fluctuations by Neural Activity Is a Basis of Blood-  
850 Oxygenation-Level-Dependent “Resting-State” Connectivity. *Neuron* **96**, 936-  
851 948.e3 (2017).
- 852 4. Ledoux, J. E., Thompson, M. E., Iadecola, C., Tucker, L. W. & Reis, D. J. Local  
853 cerebral blood flow increases during auditory and emotional processing in the  
854 conscious rat. *Science (80-. )*. **221**, 576–578 (1983).
- 855 5. Freygang, W. H. & Sokoloff, L. Quantitative Measurement of Regional Circulation  
856 in the Central Nervous System by the use of Radioactive Inert Gas. *Adv. Biol.*  
857 *Med. Phys.* **6**, 263–279 (2013).
- 858 6. Chaigneau, Emmanuelle; Oheim, Martin; Audinat, Etienne and Charpak, S.,  
859 Chaigneau, E., Oheim, M., Audinat, E. & Charpak, S. Two-photon imaging of  
860 capillary blood flow in olfactory bulb glomeruli. *Proc. Natl. Acad. Sci. U. S. A.* **489**,  
861 13081–6 (2003).

- 862 7. Hall, C. N. *et al.* Capillary pericytes regulate cerebral blood flow in health and  
863 disease. *Nature* **508**, 55–60 (2014).
- 864 8. Mishra, A. *et al.* Astrocytes mediate neurovascular signaling to capillary pericytes  
865 but not to arterioles. *Nat. Neurosci.* **19**, 1619–1627 (2016).
- 866 9. Hill, R. A. *et al.* Regional Blood Flow in the Normal and Ischemic Brain Is  
867 Controlled by Arteriolar Smooth Muscle Cell Contractility and Not by Capillary  
868 Pericytes. *Neuron* **87**, 95–110 (2015).
- 869 10. Kim, S. G. & Ogawa, S. Biophysical and physiological origins of blood  
870 oxygenation level-dependent fMRI signals. *Journal of Cerebral Blood Flow and*  
871 *Metabolism* **32**, 1188–1206 (2012).
- 872 11. Iadecola, C. The Neurovascular Unit Coming of Age: A Journey through  
873 Neurovascular Coupling in Health and Disease. *Neuron* **96**, 17–42 (2017).
- 874 12. Irikura, K., Maynard, K. I. & Moskowitz, M. A. *Importance of nitric oxide synthase*  
875 *inhibition to the attenuated vascular responses induced by topical L-nitroarginine*  
876 *during vibrissal stimulation. Journal of Cerebral Blood Flow and Metabolism* **14**,  
877 (1994).
- 878 13. Henson, R; Friston, K. *Convolution Models for FMRI. Brain Mapping: An*  
879 *Encyclopedic Reference* **1**, (2006).
- 880 14. Lindquist, M. A., Meng Loh, J., Atlas, L. Y. & Wager, T. D. Modeling the  
881 hemodynamic response function in fMRI: efficiency, bias and mis-modeling.  
882 *Neuroimage* **45**, (2009).

- 883 15. van Zijl, P. C. M., Hua, J. & Lu, H. The BOLD post-stimulus undershoot, one of  
884 the most debated issues in fMRI. *Neuroimage* **62**, 1092–1102 (2012).
- 885 16. Mayhew, John E W; Askew, Stephen; Zheng, Ying, Porrill, John; Westby, Max;  
886 Redgrave, Peter; Rector, David M; Harper, R. M. *et al. Cerebral vasomotion: A*  
887 *0.1-Hz oscillation in reflected light imaging of neural activity. NeuroImage* **4**,  
888 (Elsevier, 1996).
- 889 17. Rivadulla, C., de Labra, C., Grieve, K. L. & Cudeiro, J. Vasomotion and  
890 neurovascular coupling in the visual thalamus in vivo. *PLoS One* **6**, 28746 (2011).
- 891 18. Jones, T. W. Discovery That the Veins of the Bat's Wing (Which Are Furnished  
892 with Valves) Are Endowed with Rhythmical Contractility, and That the Onward  
893 Flow of Blood Is Accelerated by Such Contraction. *Edinburgh Med. Surg. J.* **79**,  
894 367–373 (1853).
- 895 19. Podgoreanu, M. V, Stout, R. G., El-Moalem, H. E. & Silverman, D. G.  
896 *Synchronous Rhythmical Vasomotion in the Human Cutaneous Microvasculature*  
897 *during Nonpulsatile Cardiopulmonary Bypass. Anesthesiology* **97**, (2002).
- 898 20. Vetri, F., Menicucci, D., Lapi, D., Gemignani, A. & Colantuoni, A. Pial arteriolar  
899 vasomotion changes during cortical activation in rats. *Neuroimage* **38**, 25–33  
900 (2007).
- 901 21. Intaglietta, M. *Vasomotion and flowmotion: physiological mechanisms and clinical*  
902 *evidence. Vascular Medicine Review* **vmr-1**, (2007).
- 903 22. Jackson, W. F., Mulsch, A. & Busse, R. Rhythmic smooth muscle activity in

- 904 hamster aortas is mediated by continuous release of NO from the endothelium.  
905 *Am. J. Physiol. - Hear. Circ. Physiol.* **260**, H248–H253 (1991).
- 906 23. Attwell, D. *et al.* Glial and neuronal control of brain blood flow. *Nature* **468**, 232–  
907 43 (2010).
- 908 24. Filosa, J. A., Morrison, H. W., Iddings, J. A., Du, W. & Kim, K. J. Beyond  
909 neurovascular coupling, role of astrocytes in the regulation of vascular tone.  
910 *Neuroscience* **323**, 96–109 (2016).
- 911 25. Otsu, Y. *et al.* Calcium dynamics in astrocyte processes during neurovascular  
912 coupling. *Nat. Neurosci.* **18**, 210–218 (2015).
- 913 26. Petzold, G. C. & Murthy, V. N. Role of astrocytes in neurovascular coupling.  
914 *Neuron* **71**, 782–797 (2011).
- 915 27. Anenberg, E., Chan, A. W., Xie, Y., LeDue, J. M. & Murphy, T. H. Optogenetic  
916 stimulation of GABA neurons can decrease local neuronal activity while  
917 increasing cortical blood flow. *J. Cereb. Blood Flow Metab.* **35**, 1579–1586  
918 (2015).
- 919 28. Uhlirva, H. *et al.* The roadmap for estimation of cell-typespecific neuronal activity  
920 from noninvasive measurements. *Philos. Trans. R. Soc. B Biol. Sci.* **371**,  
921 20150356 (2016).
- 922 29. Vasireddi, A. K., Vazquez, A. L., Whitney, D. E., Fukuda, M. & Kim, S.-G.  
923 Functional Connectivity of Resting Hemodynamic Signals in Submillimeter  
924 Orientation Columns of the Visual Cortex. *Brain Connect.* **6**, 596–606 (2016).

- 925 30. Longden, T. A. *et al.* Capillary K<sup>+</sup>-sensing initiates retrograde hyperpolarization to  
926 increase local cerebral blood flow. *Nat. Neurosci.* **20**, 717–726 (2017).
- 927 31. Lecrux, C. *et al.* Pyramidal Neurons Are ‘Neurogenic Hubs’ in the Neurovascular  
928 Coupling Response to Whisker Stimulation. *J. Neurosci.* **31**, 9836–9847 (2011).
- 929 32. Cauli, B. Cortical GABA Interneurons in Neurovascular Coupling: Relays for  
930 Subcortical Vasoactive Pathways. *J. Neurosci.* **24**, 8940–8949 (2004).
- 931 33. Dirnagl, U., Lindauer, U. & Villringer, A. Role of nitric oxide in the coupling of  
932 cerebral blood flow to neuronal activation in rats. *Neurosci. Lett.* **149**, 43–46  
933 (1993).
- 934 34. Stefanovic, B., Schwindt, W., Hoehn, M. & Silva, A. C. Functional uncoupling of  
935 hemodynamic from neuronal response by inhibition of neuronal nitric oxide  
936 synthase. *J. Cereb. Blood Flow Metab.* **27**, 741–754 (2007).
- 937 35. Iadecola, C., Pelligrino, D. A., Moskowitz, M. A. & Lassen, N. A. Nitric oxide  
938 synthase inhibition and cerebrovascular regulation. *J. Cereb. Blood Flow Metab.*  
939 **14**, 175–92 (1994).
- 940 36. Furchgott, R. F. & Zawadzki, J. V. The obligatory role of endothelial cells in the  
941 relaxation of arterial smooth muscle by acetylcholine. *Nature* **288**, 373–376  
942 (1980).
- 943 37. Hölscher, C. Nitric oxide, the enigmatic neuronal messenger: Its role in synaptic  
944 plasticity. *Trends Neurosci.* **20**, 298–303 (1997).
- 945 38. Lancaster, J. R. Simulation of the diffusion and reaction of endogenously



- 946 produced nitric oxide. *Proc. Natl. Acad. Sci. U. S. A.* **91**, 8137–8141 (1994).
- 947 39. Wood, J. & Garthwaite, J. Models of the diffusional spread of nitric oxide:  
948 Implications for neural nitric oxide signalling and its pharmacological properties.  
949 *Neuropharmacology* **33**, 1235–1244 (1994).
- 950 40. Philippides, A., Husbands, P. & O’Shea, M. Four-Dimensional Neuronal Signaling  
951 by Nitric Oxide: A Computational Analysis. *J. Neurosci.* **20**, 1199–1207 (2018).
- 952 41. Gally, J. A., Montague, P. R., Reeke, G. N. & Edelman, G. M. *The NO hypothesis:  
953 possible effects of a short-lived, rapidly diffusible signal in the development and  
954 function of the nervous system. Proceedings of the National Academy of Sciences*  
955 **87**, (2006).
- 956 42. O’Shea, M., Colbert, R., Williams, L. & Dunn, S. Nitric oxide compartments in the  
957 mushroom bodies of the locust brain. *Neuroreport* **9**, 333–336 (1998).
- 958 43. Knowles, R. G. & Moncada, S. Nitric oxide synthases in mammals. *Biochem. J.*  
959 **298**, 249–58 (1994).
- 960 44. Alderton, W. K., Cooper, C. E. & Knowles, R. G. Nitric oxide synthases: structure,  
961 function and inhibition. *Biochem. J.* **357**, 593 (2001).
- 962 45. Zhou, L. & Zhu, D. Y. Neuronal nitric oxide synthase: Structure, subcellular  
963 localization, regulation, and clinical implications. *Nitric Oxide - Biol. Chem.* **20**,  
964 223–230 (2009).
- 965 46. Förstermann, U. & Münzel, T. Endothelial nitric oxide synthase in vascular  
966 disease: From marvel to menace. *Circulation* **113**, 1708–1714 (2006).

- 967 47. Garthwaite, J., Charles, S. L. & Chess-Williams, R. Endothelium-derived relaxing  
968 factor release on activation of NMDA receptors suggests role as intercellular  
969 messenger in the brain. *Nature* **336**, 385–388 (1988).
- 970 48. Kroncke, K., Fehsel, K. & Kolb-Bachofen, V. Inducible nitric oxide synthase in  
971 human diseases. *Clin. Exp. Immunol.* **113**, 147–156 (1998).
- 972 49. Furchgott, R.F. and Vanhoutte, P. M. Endothelium-derived relaxing and  
973 contracting factors. *Eur. J. Pharmacol.* **183**, 2088–2089 (1989).
- 974 50. Mullershausen, F., Lange, A., Mergia, E., Friebe, A. & Koesling, D.  
975 Desensitization of NO/cGMP signaling in smooth muscle: Blood vessels versus  
976 airways. *Mol. Pharmacol.* **69**, 1969–1974 (2006).
- 977 51. Arnold, W. P., Mittal, C. K., Katsuki, S. & Murad, F. Nitric oxide activates  
978 guanylate cyclase and increases guanosine 3':5'-cyclic monophosphate levels in  
979 various tissue preparations. *Proc. Natl. Acad. Sci. U. S. A.* **74**, 3203–3207 (1977).
- 980 52. Gruetter, D. Y. *et al.* Activation of coronary arterial guanylate cyclase by nitric  
981 oxide, nitroprusside, and nitrosoguanidine—Inhibition by calcium, lanthanum, and  
982 other cations, enhancement by thiols. *Biochem. Pharmacol.* **29**, 2943–2950  
983 (1980).
- 984 53. West, G. A. *et al.* cGMP-dependent and not cAMP-dependent kinase is required  
985 for adenosine-induced dilation of intracerebral arterioles. *J. Cardiovasc.*  
986 *Pharmacol.* **41**, 444–451 (2003).
- 987 54. Hall, C. N. & Garthwaite, J. What is the real physiological NO concentration in

- 988 vivo? *Nitric Oxide - Biol. Chem.* **21**, 92–103 (2009).
- 989 55. Stingele, R., Wilson, D. A., Traystman, R. J. & Hanley, D. F. Tyrosine confounds  
990 oxidative electrochemical detection of nitric oxide. *Am. J. Physiol.* **274**, H1698–  
991 H1704 (1998).
- 992 56. Brown, G. C. & Cooper, C. E. Nanomolar concentrations of nitric oxide reversibly  
993 inhibit synaptosomal respiration by competing with oxygen at cytochrome  
994 oxidase. *FEBS-letters* **356(2–3)**, 295–298 (1994).
- 995 57. Shiva, S. *et al.* Nitroxia: The pathological consequence of dysfunction in the nitric  
996 oxide-cytochrome c oxidase signaling pathway. *Free Radical Biology and*  
997 *Medicine* **38**, 297–306 (2005).
- 998 58. Steinert, J. R., Chernova, T. & Forsythe, I. D. Nitric Oxide Signaling in Brain  
999 Function, Dysfunction, and Dementia. *Neurosci.* **16**, 435–452
- 1000 59. Tsoukias, N. M., Kavdia, M. & Popel, A. S. A theoretical model of nitric oxide  
1001 transport in arterioles: frequency- vs. amplitude-dependent control of cGMP  
1002 formation. *Am. J. Physiol. Heart Circ. Physiol.* **286**, H1043-56 (2004).
- 1003 60. Logothetis, N. K., Auguth, M., Oeltermann, A., Pauls, J. & Trinath, T. A  
1004 neurophysiological investigation of the basis of the BOLD signal in fMRI. *Nature*  
1005 **412**, 150–157 (2001).
- 1006 61. Li, J. & Iadecola, C. Nitric oxide and adenosine mediate vasodilation during  
1007 functional activation in cerebellar cortex. *Neuropharmacology* **33**, 1453–1461  
1008 (1994).

- 1009 62. Lindauer, U., Megow, D., Matsuda, H. & Dirnagl, U. Nitric oxide: a modulator, but  
1010 not a mediator, of neurovascular coupling in rat somatosensory cortex. *Am. J.*  
1011 *Physiol.* **277**, H799-811 (1999).
- 1012 63. Lourenço, C. F. *et al.* Neurovascular coupling in hippocampus is mediated via  
1013 diffusion by neuronal-derived nitric oxide. *Free Radic. Biol. Med.* **73**, 421–429  
1014 (2014).
- 1015 64. Muñoz, M. F., Puebla, M. & Figueroa, X. F. Control of the neurovascular coupling  
1016 by nitric oxide-dependent regulation of astrocytic Ca<sup>2+</sup> signaling. *Front. Cell.*  
1017 *Neurosci.* **9**, (2015).
- 1018 65. Kim, K. J., Ramiro Diaz, J., Iddings, J. A. & Filosa, J. A. Vasculo-Neuronal  
1019 Coupling: Retrograde Vascular Communication to Brain Neurons. *J. Neurosci.* **36**,  
1020 12624–12639 (2016).
- 1021 66. Perrenoud, Q. *et al.* Activation of cortical 5-HT<sub>3</sub> receptor-expressing interneurons  
1022 induces NO mediated vasodilatations and NPY mediated vasoconstrictions. *Front.*  
1023 *Neural Circuits* **6**, (2012).
- 1024 67. Garthwaite, G. *et al.* Signaling from Blood Vessels to CNS Axons through Nitric  
1025 Oxide. *J. Neurosci.* **26**, 7730–7740 (2006).
- 1026 68. Cudeiro, J. *et al.* Actions of compounds manipulating the nitric oxide system in the  
1027 cat primary visual cortex. *J. Physiol.* **504**, 467–478 (1997).
- 1028 69. Kara, P. & Friedlander, M. J. Arginine analogs modify signal detection by neurons  
1029 in the visual cortex. *J Neurosci* **19**, 5528–5548 (1999).

- 1030 70. Smith, S. L. & Otis, T. S. Persistent changes in spontaneous firing of purkinje  
1031 neurons triggered by the nitric oxide signaling cascade. *J. Neurosci.* **23**, 367–372  
1032 (2003).
- 1033 71. Garthwaite, J. Concepts of neural nitric oxide-mediated transmission. *European*  
1034 *Journal of Neuroscience* **27**, 2783–2802 (2008).
- 1035 72. Kano, T., Shimizu-Sasamata, M., Huang, P. L., Moskowitz, M. A. & Lo, E. H.  
1036 Effects of nitric oxide synthase gene knockout on neurotransmitter release in vivo.  
1037 *Neuroscience* **86**, 695–699 (1998).
- 1038 73. Thomas, D. D. The biological lifetime of nitric oxide: Implications for the  
1039 perivascular dynamics of NO and O<sub>2</sub>. *Proc. Natl. Acad. Sci.* **98**, 355–360 (2001).
- 1040 74. Liu, X. *et al.* Oxygen regulates the effective diffusion distance of nitric oxide in the  
1041 aortic wall. *Free Radic. Biol. Med.* **48**, 554–559 (2010).
- 1042 75. Vaughn, M. W., Kuo, L. & Liao, J. C. Effective diffusion distance of nitric oxide in  
1043 the microcirculation. *Am. J. Physiol.* **274**, H1705–H1714 (1998).
- 1044 76. Lamkin-Kennard, K. A., Buerk, D. G. & Jaron, D. Interactions between NO and O<sub>2</sub>  
1045 in the microcirculation: A mathematical analysis. *Microvasc. Res.* **68**, 38–50  
1046 (2004).
- 1047 77. Liu, X., Yan, Q., Baskerville, K. L. & Zweier, J. L. Estimation of nitric oxide  
1048 concentration in blood for different rates of generation: Evidence that intravascular  
1049 nitric oxide levels are too low to exert physiological effects. *J. Biol. Chem.* **282**,  
1050 8831–8836 (2007).

- 1051 78. Kavdia, M. & Popel, A. S. Contribution of nNOS- and eNOS-derived NO to  
1052 microvascular smooth muscle NO exposure. *J. Appl. Physiol.* **97**, 293–301 (2004).
- 1053 79. Kim, S., Kong, R. L., Popel, A. S., Intaglietta, M. & Johnson, P. C. Temporal and  
1054 spatial variations of cell-free layer width in arterioles. *AJP Hear. Circ. Physiol.*  
1055 **293**, H1526–H1535 (2007).
- 1056 80. Sharan, M. & Popel, A. S. A two-phase model for flow of blood in narrow tubes  
1057 with increased effective viscosity near the wall. *Biorheology* **38**, 415–428 (2001).
- 1058 81. Soutani, M., Suzuki, Y., Tateishi, N. & Maeda, N. Quantitative evaluation of flow  
1059 dynamics of erythrocytes in microvessels: Influence of erythrocyte aggregation.  
1060 *Am. J. Physiol. - Hear. Circ. Physiol.* **268**, H1959–H1965 (1995).
- 1061 82. Telford, R. D. *et al.* Footstrike is the major cause of hemolysis during running. *J.*  
1062 *Appl. Physiol.* **94**, 38–42 (2003).
- 1063 83. Reiter, C. D. *et al.* Cell-free hemoglobin limits nitric oxide bioavailability in sickle-  
1064 cell disease. *Nat. Med.* **8**, 1383–1389 (2002).
- 1065 84. Garratty, G. Drug-induced immune hemolytic anemia. *Hematology Am. Soc.*  
1066 *Hematol. Educ. Program* 73–79 (2009). doi:10.1182/asheducation-2009.1.73
- 1067 85. Risbano, M. G. *et al.* Effects of aged stored autologous red blood cells on human  
1068 endothelial function. *Am. J. Respir. Crit. Care Med.* **192**, 1223–1233 (2015).
- 1069 86. Shapira, Y., Vaturi, M. & Sagie, A. Hemolysis associated with prosthetic heart  
1070 valves: A review. *Cardiology in Review* **17**, 121–124 (2009).
- 1071 87. Saylor, D. M., Buehler, P. W., Brown, R. P. & Malinauskas, R. A. Predicting

- 1072 plasma free hemoglobin levels in patients due to medical device-related  
1073 hemolysis. *ASAIO J.* **65**, 207–218 (2019).
- 1074 88. Gramaglia, I. *et al.* Low nitric oxide bioavailability contributes to the genesis of  
1075 experimental cerebral malaria. *Nat. Med.* **12**, 1417–1422 (2006).
- 1076 89. Vermeulen Windsant, I. C. *et al.* Blood transfusions increase circulating plasma  
1077 free hemoglobin levels and plasma nitric oxide consumption: A prospective  
1078 observational pilot study. *Crit. Care* **16**, (2012).
- 1079 90. Minneci, P. C. *et al.* Hemolysis-associated endothelial dysfunction mediated by  
1080 accelerated NO inactivation by decompartmentalized oxyhemoglobin. *J. Clin.*  
1081 *Invest.* **115**, 3409–3417 (2005).
- 1082 91. Tsoukias, N. M. & Popel, A. S. Erythrocyte consumption of nitric oxide in  
1083 presence and absence of plasma-based hemoglobin. *Am. J. Physiol. Heart Circ.*  
1084 *Physiol.* **282**, H2265–H2277 (2002).
- 1085 92. Han, G., Friedman, A. J., Friedman, J. M., Nacharaju, P. & Cabrales, P. Reversal  
1086 of hemoglobin-induced vasoconstriction with sustained release of nitric oxide. *Am.*  
1087 *J. Physiol. Circ. Physiol.* **300**, H49–H56 (2010).
- 1088 93. Zhang, J., Johnson, P. C. & Popel, A. S. Effects of erythrocyte deformability and  
1089 aggregation on the cell free layer and apparent viscosity of microscopic blood  
1090 flows. *Microvasc. Res.* **77**, 265–272 (2009).
- 1091 94. Chen, K. & Popel, A. S. Nitric oxide production pathways in erythrocytes and  
1092 plasma. *Biorheology* **46**, 107–119 (2009).

- 1093 95. Tsoukias, N. M. & Popel, A. S. A model of nitric oxide capillary exchange.  
1094 *Microcirculation* **10**, 479–495 (2003).
- 1095 96. Kavdia, M., Tsoukias, N. M. & Popel, A. S. Model of nitric oxide diffusion in an  
1096 arteriole: Impact of hemoglobin-based blood substitutes. *Am. J. Physiol. - Hear.*  
1097 *Circ. Physiol.* **282**, 2245–2253 (2002).
- 1098 97. Butler, A. R., Megson, I. L. & Wright, P. G. Diffusion of nitric oxide and scavenging  
1099 by blood in the vasculature. *Biochim. Biophys. Acta - Gen. Subj.* **1425**, 168–176  
1100 (1998).
- 1101 98. Buerk, D. G. *Can We Model Nitric Oxide Biotransport? A Survey of Mathematical*  
1102 *Models for a Simple Diatomic Molecule with Surprisingly Complex Biological*  
1103 *Activities. Annual Review of Biomedical Engineering* **3**, (2001).
- 1104 99. Tsoukias, N. M. Nitric oxide bioavailability in the microcirculation: Insights from  
1105 mathematical models. *Microcirculation* **15**, 813–834 (2008).
- 1106 100. Chen, K. & Popel, A. S. Theoretical analysis of biochemical pathways of nitric  
1107 oxide release from vascular endothelial cells. *Free Radic. Biol. Med.* **41**, 668–680  
1108 (2006).
- 1109 101. Moore, C. I. & Cao, R. The Hemo-Neural Hypothesis: On The Role of Blood Flow  
1110 in Information Processing. *J. Neurophysiol.* **99**, 2035–2047 (2008).
- 1111 102. Cao, R. *et al.* Pinacidil induces vascular dilation and hyperemia in vivo and does  
1112 not impact biophysical properties of neurons and astrocytes in vitro. *Cleve. Clin. J.*  
1113 *Med.* **76**, (2009).



- 1114 103. Nishimura, N. *et al.* Targeted insult to subsurface cortical blood vessels using  
1115 ultrashort laser pulses: Three models of stroke. *Nat. Methods* **3**, 99–108 (2006).
- 1116 104. Nishimura, N., Schaffer, C. B., Friedman, B., Lyden, P. D. & Kleinfeld, D.  
1117 Penetrating arterioles are a bottleneck in the perfusion of neocortex. *Proc. Natl.*  
1118 *Acad. Sci.* **104**, 365–370 (2007).
- 1119 105. Nishimura, N., Rosidi, N. L., Iadecola, C. & Schaffer, C. B. Limitations of collateral  
1120 flow after occlusion of a single cortical penetrating arteriole. *J. Cereb. Blood Flow*  
1121 *Metab.* **30**, 1914–1927 (2010).
- 1122 106. Shih, A. Y. *et al.* Robust and fragile aspects of cortical blood flow in relation to the  
1123 underlying angioarchitecture. *Microcirculation* **22**, 204–218 (2015).
- 1124 107. Shih, A. Y. *et al.* The smallest stroke: Occlusion of one penetrating vessel leads to  
1125 infarction and a cognitive deficit. *Nat. Neurosci.* **16**, 55–63 (2013).
- 1126 108. Schmid, F., Tsai, P. S., Kleinfeld, D., Jenny, P. & Weber, B. Depth-dependent  
1127 flow and pressure characteristics in cortical microvascular networks. *PLoS*  
1128 *Comput. Biol.* **13**, e1005392 (2017).
- 1129 109. Rungta, R. L., Chaigneau, E., Osmanski, B.-F. & Charpak, S. Vascular  
1130 Compartmentalization of Functional Hyperemia from the Synapse to the Pia.  
1131 *Neuron* **99**, 362-375.e4 (2018).
- 1132 110. Blinder, P. *et al.* The cortical angiome: An interconnected vascular network with  
1133 noncolumnar patterns of blood flow. *Nat. Neurosci.* **16**, 889–897 (2013).
- 1134 111. Hirsch, S., Reichold, J., Schneider, M., Székely, G. & Weber, B. Topology and

- 1135 hemodynamics of the cortical cerebrovascular system. *J. Cereb. Blood Flow*  
1136 *Metab.* **32**, 952–967 (2012).
- 1137 112. Kavdia, M. & Popel, A. S. Wall shear stress differentially affects NO level in  
1138 arterioles for volume expanders and Hb-based O<sub>2</sub> carriers. *Microvasc. Res.* **66**,  
1139 49–58 (2003).
- 1140 113. Montague, P. R., Gancayo, C. D., Winn, M. J., Marchase, R. B. & Frielander, M.  
1141 J. Role of NO production in NMDA receptor-mediated neurotransmitter release in  
1142 cerebral cortex. *Science (80-. )*. **263**, 973–977 (1994).
- 1143 114. Kashiwagi, S., Kajimura, M., Yoshimura, Y. & Suematsu, M. Nonendothelial  
1144 source of nitric oxide in arterioles but not in venules: Alternative source revealed  
1145 in vivo by diaminofluorescein microfluorography. *Circ. Res.* **91**, e55–e64 (2002).
- 1146 115. Brown, L. A., Key, B. J. & Lovick, T. A. Fluorescent imaging of nitric oxide  
1147 production in neuronal varicosities associated with intraparenchymal arterioles in  
1148 rat hippocampal slices. *Neurosci. Lett.* **294**, 9–12 (2000).
- 1149 116. Lee, S.-P., Duong, T. Q., Yang, G., Iadecola, C. & Kim, S.-G. Relative Changes of  
1150 Cerebral Arterial and Venous Blood Volumes During Increased Cerebral Blood  
1151 Flow: Implications for BOLD fMRI.
- 1152 117. Gao, Y.-R. & Drew, P. J. Effects of Voluntary Locomotion and Calcitonin Gene-  
1153 Related Peptide on the Dynamics of Single Dural Vessels in Awake Mice. *J.*  
1154 *Neurosci.* **36**, 2503–2516 (2016).
- 1155 118. Clementi, E., Brown, G. C., Foxwell, N. & Moncada, S. *On the mechanism by*

- 1156            *which vascular endothelial cells regulate their oxygen consumption. Proceedings*  
1157            *of the National Academy of Sciences* **96**, (1999).
- 1158    119. Cooper, C. E. *et al.* Nitric oxide and peroxynitrite cause irreversible increases in  
1159            the Km for oxygen of mitochondrial cytochrome oxidase: In vitro and in vivo  
1160            studies. *Biochim. Biophys. Acta - Bioenerg.* **1607**, 27–34 (2003).
- 1161    120. Devor, A. *et al.* ‘Overshoot’ of O<sub>2</sub> is required to maintain baseline tissue  
1162            oxygenation at locations distal to blood vessels. *J. Neurosci.* **31**, 13676–13681  
1163            (2011).
- 1164    121. Lyons, D. G., Parpaleix, A., Roche, M. & Charpak, S. Mapping oxygen  
1165            concentration in the awake mouse brain. *Elife* **5**, 1–16 (2016).
- 1166    122. Li, B. *et al.* More homogeneous capillary flow and oxygenation in deeper cortical  
1167            layers correlate with increased oxygen extraction. *Elife* **8**, (2019).
- 1168    123. Roche, M. *et al.* In vivo imaging with a water immersion objective affects brain  
1169            temperature, blood flow and oxygenation. *Elife* **8**, (2019).
- 1170    124. Sakadžić, S. *et al.* Large arteriolar component of oxygen delivery implies a safe  
1171            margin of oxygen supply to cerebral tissue. *Nat. Commun.* **5**, (2014).
- 1172    125. Bellamy, T. C., Wood, J., Goodwin, D. A. & Garthwaite, J. Rapid desensitization  
1173            of the nitric oxide receptor, soluble guanylyl cyclase, underlies diversity of cellular  
1174            cGMP responses. *Proc. Natl. Acad. Sci. U. S. A.* **97**, 2928–2933 (2000).
- 1175    126. Cary, S. P. L., Winger, J. A. & Marletta, M. A. Tonic and acute nitric oxide  
1176            signaling through soluble guanylate cyclase is mediated by nonheme nitric oxide,

- 1177           ATP, and GTP. *Proc. Natl. Acad. Sci. U. S. A.* **102**, 13064–13069 (2005).
- 1178   127. Moncada, S., Rees, D. D., Schulz, R. & Palmer, R. M. J. Development and  
1179           mechanism of a specific supersensitivity to nitrovasodilators after inhibition of  
1180           vascular nitric oxide synthesis in vivo. *Proc. Natl. Acad. Sci.* **88**, 2166–2170  
1181           (2006).
- 1182   128. Münzel, T., Daiber, A. & Mülsch, A. Explaining the phenomenon of nitrate  
1183           tolerance. *Circ. Res.* **97**, 618–628 (2005).
- 1184   129. Huo, B. X., Gao, Y. R. & Drew, P. J. Quantitative separation of arterial and  
1185           venous cerebral blood volume increases during voluntary locomotion.  
1186           *Neuroimage* **105**, 369–379 (2015).
- 1187   130. Tran, C. H. T., Peringod, G. & Gordon, G. R. Astrocytes Integrate Behavioral  
1188           State and Vascular Signals during Functional Hyperemia. *Neuron* **100**, 1133-  
1189           1148.e3 (2018).
- 1190   131. Winder, A. T., Echagarruga, C., Zhang, Q. & Drew, P. J. Weak correlations  
1191           between hemodynamic signals and ongoing neural activity during the resting  
1192           state. *Nat. Neurosci.* **20**, 1761–1769 (2017).
- 1193   132. Dayan, P. & Abbott, L. F. Theoretical Neuroscience: Computational and  
1194           Mathematical Modeling of Neural Systems. *Comput. Math. Model. Neural ...* 480  
1195           (2001).
- 1196   133. Silva, A. C., Koretsky, A. P. & Duyn, J. H. Functional MRI impulse response for  
1197           BOLD and CBV contrast in rat somatosensory cortex. *Magn. Reson. Med.* **57**,

- 1198 1110–1118 (2007).
- 1199 134. Colantuoni, A., Bertuglia, S. & Intaglietta, M. *Quantitation of rhythmic diameter*  
1200 *changes in arterial microcirculation. American Journal of Physiology-Heart and*  
1201 *Circulatory Physiology* **246**, ( American Physiological Society Bethesda, MD ,  
1202 1984).
- 1203 135. Williams, R. S., Wagner, P. D. & University of Texas Southwestern Medical  
1204 Center, D. T. U. S. A. williams ryburn swmed edu. Transgenic animals in  
1205 integrative biology: approaches and interpretations of outcome. *J Appl Physiol*  
1206 **88(3)**, 1119–1126 (2000).
- 1207 136. Nilsson, H. & Aalkjaer, C. *Vasomotion: mechanisms and physiological*  
1208 *importance. Molecular interventions* **3**, (2003).
- 1209 137. Arciero, J. C. & Secomb, T. W. Spontaneous oscillations in a model for active  
1210 control of microvessel diameters. *Math. Med. Biol.* **29**, 163–180 (2012).
- 1211 138. Gonzalez-Fernandez, J. M. & Ermentrout, B. On the origin and dynamics of the  
1212 vasomotion of small arteries. *Math. Biosci.* **119**, 127–167 (1994).
- 1213 139. Aalkjær, C., Boedtkjer, D. & Matchkov, V. Vasomotion – what is currently  
1214 thought? *Acta Physiologica* **202**, 253–269 (2011).
- 1215 140. Levin, J. M. *et al.* Influence of baseline hematocrit and hemodilution on BOLD  
1216 fMRI activation. *Magn. Reson. Imaging* **19**, 1055–1062 (2001).
- 1217 141. Schuster, C. J., Weil, M. H., Besso, J., Carpio, M. & Henning, R. J. Blood volume  
1218 following diuresis induced by furosemide. *Am. J. Med.* **76**, 585–592 (1984).

- 1219 142. Brookhart, M. A. *et al.* The effect of altitude on dosing and response to  
1220 erythropoietin in ESRD. *J. Am. Soc. Nephrol.* **19**, 1389–1395 (2008).
- 1221 143. Akunov, A., Sydykov, A., Toktash, T., Doolotova, A. & Sarybaev, A. Hemoglobin  
1222 changes after longterm intermittent work at high altitude. *Front. Physiol.* **9**, (2018).
- 1223 144. Carlsen, E. & Comroe, J. H. The rate of uptake of carbon monoxide and of nitric  
1224 oxide by normal human erythrocytes and experimentally produced spherocytes. *J.*  
1225 *Gen. Physiol.* **42**, 83–107 (1958).
- 1226 145. Liu, X. *et al.* Diffusion-limited Reaction of Free Nitric Oxide with Erythrocytes\*. *J.*  
1227 *Biol. Chem.* **273**, 18709–18713 (1998).
- 1228 146. Yeo, T. W. W. *et al.* Relationship of Cell-Free Hemoglobin to Impaired Endothelial  
1229 Nitric Oxide Bioavailability and Perfusion in Severe Falciparum Malaria. *J. Infect.*  
1230 *Dis.* **200**, 1522–1529 (2009).
- 1231 147. Donadee, C. *et al.* Nitric Oxide Scavenging by Red Blood Cell Microparticles and  
1232 Cell-Free Hemoglobin as a Mechanism for the Red Cell Storage Lesion.  
1233 *Circulation* **124**, 465–476 (2011).
- 1234 148. Smith, M. J., Le Roux, P. D., Elliott, J. P. & Winn, H. R. Blood transfusion and  
1235 increased risk for vasospasm and poor outcome after subarachnoid hemorrhage.  
1236 *J. Neurosurg.* **101**, 1–7 (2004).
- 1237 149. Assadi, F. Vasoconstrictor-induced hypertension following multiple blood  
1238 transfusions in children with congenital hemolytic anemia. *Iran. J. Kidney Dis.* **2**,  
1239 132–6 (2008).

- 1240 150. Dou, Y. H., Fuh, J. L., Chen, S. P. & Wang, S. J. Reversible cerebral  
1241 vasoconstriction syndrome after blood transfusion. *Headache* **54**, 736–744  
1242 (2014).
- 1243 151. Liang, H., Xu, Z., Zheng, Z., Lou, H. & Yue, W. Reversible cerebral  
1244 vasoconstriction syndrome following red blood cells transfusion: A case series of  
1245 7 patients. *Orphanet J. Rare Dis.* **10**, 47 (2015).
- 1246 152. Yeo, T. W. *et al.* Impaired nitric oxide bioavailability and L-arginine-reversible  
1247 endothelial dysfunction in adults with falciparum malaria. *J. Exp. Med.* **204**, 2693–  
1248 2704 (2007).
- 1249 153. Pawloski, J. R., Hess, D. T. & Stamler, J. S. Impaired vasodilation by red blood  
1250 cells in sickle cell disease. *Proc. Natl. Acad. Sci. U. S. A.* **102**, 2531–6 (2005).
- 1251 154. Sampei, K. *et al.* Role of nitric oxide scavenging in vascular response to cell-free  
1252 hemoglobin transfusion. *American Journal of Physiology-Heart and Circulatory*  
1253 *Physiology* **289**, (2005).
- 1254 155. Namgung, B. & Kim, S. Effect of uneven red cell influx on formation of cell-free  
1255 layer in small venules. *Microvasc. Res.* (2014). doi:10.1016/j.mvr.2014.01.007
- 1256 156. Liao, J. C., Hein, T. W., Vaughn, M. W., Huang, K. T. & Kuo, L. Intravascular flow  
1257 decreases erythrocyte consumption of nitric oxide. *Proc. Natl. Acad. Sci. U. S. A.*  
1258 **96**, 8757–8761 (1999).
- 1259 157. Hoiland, R. L. *et al.* Adenosine receptor-dependent signaling is not obligatory for  
1260 normobaric and hypobaric hypoxia-induced cerebral vasodilation in humans. *J.*

- 1261            *Appl. Physiol.* **122**, 795–808 (2017).
- 1262    158. Maher, A. R. *et al.* Hypoxic modulation of exogenous nitrite-induced vasodilation  
1263            in humans. *Circulation* **117**, 670–677 (2008).
- 1264    159. Shapiro, W., Wasserman, A. J. & Patterson, J. L. *Human cerebrovascular*  
1265            *response to combined hypoxia and hypercapnia. Circulation research* **19**, (1966).
- 1266    160. Binks, A. P., Cunningham, V. J., Adams, L. & Banzett, R. B. Gray matter blood  
1267            flow change is unevenly distributed during moderate isocapnic hypoxia in  
1268            humans. *J. Appl. Physiol.* **104**, 212–217 (2008).
- 1269    161. Steinback, C. D. & Poulin, M. J. Cardiovascular and cerebrovascular responses to  
1270            acute isocapnic and poikilocapnic hypoxia in humans. *J. Appl. Physiol.* **104**, 482–  
1271            489 (2008).
- 1272    162. Nakamura, T. *et al.* Acute CO<sub>2</sub>-independent vasodilatation of penetrating and pre-  
1273            capillary arterioles in mouse cerebral parenchyma upon hypoxia revealed by a  
1274            thinned-skull window method. *Acta Physiol.* **203**, 187–196 (2011).
- 1275    163. Mishra, A., Hamid, A. & Newman, E. A. Oxygen modulation of neurovascular  
1276            coupling in the retina. *Proc. Natl. Acad. Sci.* **108**, 17827–17831 (2011).
- 1277    164. Brown, M. M., Wade, J. P. H. & Marshall, J. Fundamental importance of arterial  
1278            oxygen content in the regulation of cerebral blood flow in man. *Brain* **108**, 81–93  
1279            (1985).
- 1280    165. Hudetz, A. G., Biswal, B. B., Fehér, G. & Kampine, J. P. Effects of hypoxia and  
1281            hypercapnia on capillary flow velocity in the rat cerebral cortex. *Microvasc. Res.*



- 1282           **54**, 35–42 (1997).
- 1283   166. Eperon, G., Johnson, M. & David, N. J. The effect of arterial PO<sub>2</sub> on relative  
1284       retinal blood flow in monkeys. *Invest. Ophthalmol.* **14**, 342–52 (1975).
- 1285   167. Blitzer, M. L., Lee, S. D. & Creager, M. A. *Endothelium-derived nitric oxide*  
1286       *mediates hypoxic vasodilation of resistance vessels in humans. American Journal*  
1287       *of Physiology-Heart and Circulatory Physiology* **271**, (2017).
- 1288   168. Doblár, D. D. *et al.* Dynamic characteristics of cerebral blood flow response to  
1289       sinusoidal hypoxia. *J. Appl. Physiol.* **46**, 721–729 (1979).
- 1290   169. Ray, C. J., Abbas, A. R., Coney, A. M. & Marshall, J. M. Interactions of  
1291       adenosine, prostaglandins and nitric oxide in hypoxia-induced vasodilatation: In  
1292       vivo and in vitro studies. *J. Physiol.* **544**, 195–209 (2002).
- 1293   170. Borgström, L., Jóhannsson, H. & Siesjö, B. K. *The Relationship between Arterial*  
1294       *PO<sub>2</sub> and Cerebral Blood Flow in Hypoxic Hypoxia. Acta Physiologica*  
1295       *Scandinavica* **93**, (1975).
- 1296   171. Jennett, S., Pitts, L. H. & North, J. B. *Rapid Cerebral Vasodilatation in Brief*  
1297       *Hypoxia in Anaesthetized Animals. Quarterly Journal of Experimental Physiology*  
1298       **66**, (1981).
- 1299   172. Poulin, M. J., Liang, P. J. & Robbins, P. A. *Dynamics of the cerebral blood flow*  
1300       *response to step changes in end-tidal PCO<sub>2</sub> and PO<sub>2</sub> in humans. Journal of*  
1301       *Applied Physiology* **81**, (2017).
- 1302   173. Ainslie, P. N. & Poulin, M. J. Ventilatory, cerebrovascular, and cardiovascular

- 1303 interactions in acute hypoxia: regulation by carbon dioxide. *J. Appl. Physiol.* **97**,  
1304 149–159 (2004).
- 1305 174. Meadows, G. E. *et al.* Overnight changes in the cerebral vascular response to  
1306 isocapnic hypoxia and hypercapnia in healthy humans: Protection against stroke.  
1307 *Stroke* **36**, 2367–2372 (2005).
- 1308 175. Robinson, J. M. & Lancaster, J. R. Hemoglobin-mediated, hypoxia-induced  
1309 vasodilation via nitric oxide: Mechanism(s) and physiologic versus  
1310 pathophysiologic relevance. *Am. J. Respir. Cell Mol. Biol.* **32**, 257–261 (2005).
- 1311 176. Agvald, P., Adding, L. C., Artlich, A., Persson, M. G. & Gustafsson, L. E.  
1312 Mechanisms of nitric oxide generation from nitroglycerin and endogenous sources  
1313 during hypoxia in vivo. *Br. J. Pharmacol.* **135**, 373–382 (2002).
- 1314 177. Reid, J. M., Davies, A. G., Ashcroft, F. M. & Paterson, D. J. *Effect of L-NMMA,*  
1315 *cromakalim, and glibenclamide on cerebral blood flow in hypercapnia and*  
1316 *hypoxia. American Journal of Physiology-Heart and Circulatory Physiology* **269**,  
1317 (2017).
- 1318 178. Buerk, D. G., Liu, Y., Zaccheo, K. A., Barbee, K. A. & Jaron, D. Nitrite-mediated  
1319 hypoxic vasodilation predicted from mathematical modeling and quantified from in  
1320 vivo studies in rat mesentery. *Front. Physiol.* **8**, 1053 (2017).
- 1321 179. Van Mil, A. H. M. *et al.* Nitric oxide mediates hypoxia-induced cerebral  
1322 vasodilation in humans. *J. Appl. Physiol.* **92**, 962–966 (2002).
- 1323 180. Collins, J. A., Rudenski, A., Gibson, J., Howard, L. & O'Driscoll, R. Relating

- 1324 oxygen partial pressure, saturation and content: The haemoglobin–oxygen  
1325 dissociation curve. *Breathe* **11**, 194–201 (2015).
- 1326 181. Hoff, J. T., MacKenzie, E. T. & Harper, A. M. *Responses of the cerebral*  
1327 *circulation to hypercapnia and hypoxia after 7th cranial nerve transection in*  
1328 *baboons. Circulation Research* **40**, (1977).
- 1329 182. Hamilton, N. B. Pericyte-mediated regulation of capillary diameter: a component  
1330 of neurovascular coupling in health and disease. *Front. Neuroenergetics* **2**,  
1331 (2010).
- 1332 183. Chen, X., Buerk, D. G., Barbee, K. A. & Jaron, D. A model of NO/O<sub>2</sub> transport in  
1333 capillary-perfused tissue containing an arteriole and venule pair. *Ann. Biomed.*  
1334 *Eng.* **35**, 517–529 (2007).
- 1335 184. Yan, Q., Liu, Q., Zweier, J. L. & Liu, X. Potency of authentic nitric oxide in  
1336 inducing aortic relaxation. *Pharmacol. Res.* **55**, 329–334 (2007).
- 1337 185. Kim, Y. *et al.* Brain-wide Maps Reveal Stereotyped Cell-Type-Based Cortical  
1338 Architecture and Subcortical Sexual Dimorphism. *Cell* **171**, 456-469.e22 (2017).
- 1339 186. Tsai, P. S. *et al.* Correlations of neuronal and microvascular densities in murine  
1340 cortex revealed by direct counting and colocalization of nuclei and vessels. *J.*  
1341 *Neurosci.* **29**, 14553–14570 (2009).
- 1342 187. Huo, B. X. X., Smith, J. B. B. & Drew, P. J. J. Neurovascular coupling and  
1343 decoupling in the cortex during voluntary locomotion. *J. Neurosci.* **34**, 10975–  
1344 10981 (2014).

- 1345 188. Handwerker, D. A. A., Ollinger, J. M. M. & D'Esposito, M. Variation of BOLD  
1346 hemodynamic responses across subjects and brain regions and their effects on  
1347 statistical analyses. *Neuroimage* **21**, 1639–1651 (2004).
- 1348 189. Devonshire, I. M. M. *et al.* Neurovascular coupling is brain region-dependent.  
1349 *Neuroimage* **59**, 1997–2006 (2012).
- 1350 190. Shih, Y. Y. I. Y. I., Wey, H. Y. Y., De La Garza, B. H. H. & Duong, T. Q. Q. Striatal  
1351 and cortical BOLD, blood flow, blood volume, oxygen consumption, and glucose  
1352 consumption changes in noxious forepaw electrical stimulation. *J. Cereb. Blood*  
1353 *Flow Metab.* **31**, 832–841 (2011).
- 1354 191. Mullinger, K. J., Mayhew, S. D., Bagshaw, A. P., Bowtell, R. & Francis, S. T.  
1355 Poststimulus undershoots in cerebral blood flow and BOLD fMRI responses are  
1356 modulated by poststimulus neuronal activity. *Proc. Natl. Acad. Sci.* **110**, 13636–  
1357 13641 (2013).
- 1358 192. Woldemariam, S. *et al.* Using a Robust and Sensitive GFP-Based cGMP Sensor  
1359 for Real Time Imaging in Intact *Caenorhabditis elegans*. *Genetics*  
1360 *genetics.302392.2019* (2019). doi:10.1534/genetics.119.302392
- 1361 193. Nikolaev, V. O. O., Gambaryan, S. & Lohse, M. J. J. Fluorescent sensors for rapid  
1362 monitoring of intracellular cGMP. *Nat. Methods* **3**, 23–25 (2006).
- 1363 194. Krawchuk, M. B. B., Ruff, C. F. F., Yang, X., Ross, S. E. E. & Vazquez, A. L. L.  
1364 Optogenetic assessment of VIP, PV, SOM and NOS inhibitory neuron activity and  
1365 cerebral blood flow regulation in mouse somato-sensory cortex. *J. Cereb. Blood*  
1366 *Flow Metab.* 0271678X1987010 (2019). doi:10.1177/0271678x19870105

- 1367 195. Malinski, T. *et al.* Diffusion of nitric oxide in the aorta wall. Monitored in situ by  
1368 porphyrinic microsensors. *Biochem. Biophys. Res. Commun.* **193**, 1076–1082  
1369 (1993).
- 1370 196. Krogh, A. The supply of oxygen to the tissues and the regulation of the capillary  
1371 circulation. *J. Physiol.* **52**, 457–474 (1919).
- 1372 197. Sakadžić, S. *et al.* Two-photon microscopy measurement of cerebral metabolic  
1373 rate of oxygen using periarteriolar oxygen concentration gradients.  
1374 *Neurophotonics* **3**, 045005 (2016).
- 1375 198. Goldman, D. Theoretical models of microvascular oxygen transport to tissue.  
1376 *Microcirculation* **15**, 795–811 (2008).
- 1377 199. Kety, S. S. *Blood Flow and metabolism of the human brain in health and disease.*  
1378 *Trans Stud Coll Phys Philad* **18**, (1951).
- 1379 200. Clarke, D. D., Sokoloff Donald Dudley Clarke, L., Sokoloff, L. & Dudley, D.  
1380 *Circulation and energy metabolism in the brain / Recommended Citation*  
1381 *"Circulation and energy metabolism in the brain.* **81**, (1999).
- 1382 201. Sakadžić, S. *et al.* Two-photon high-resolution measurement of partial pressure of  
1383 oxygen in cerebral vasculature and tissue. doi:10.1038/nmeth.1490
- 1384 202. Tateishi, N., Suzuki, Y., Soutani, M. & Maeda, N. Flow dynamics of erythrocytes  
1385 in microvessels of isolated rabbit mesentery: Cell-free layer and flow resistance.  
1386 *J. Biomech.* **27**, 1119–1125 (1994).
- 1387 203. Kim, H. W. & Greenburg, A. G. Mechanisms for vasoconstriction and decreased

- 1388 blood flow following intravenous administration of cell-free native hemoglobin  
1389 solutions. *Adv. Exp. Med. Biol.* **566**, 397–401 (2005).
- 1390 204. Herold, S., Exner, M. & Nauser, T. Kinetic and mechanistic studies of the NO•-  
1391 mediated oxidation of oxymyoglobin and oxyhemoglobin. *Biochemistry* **40**, 3385–  
1392 3395 (2001).
- 1393 205. Deonikar, P. & Kavdia, M. Low micromolar intravascular cell-free hemoglobin  
1394 concentration affects vascular NO bioavailability in sickle cell disease: a  
1395 computational analysis. *J. Appl. Physiol.* **112**, 1383–92 (2012).
- 1396 206. Chen, K. & Popel, A. S. Vascular and perivascular nitric oxide release and  
1397 transport: Biochemical pathways of neuronal nitric oxide synthase (NOS1) and  
1398 endothelial nitric oxide synthase (NOS3). *Free Radic. Biol. Med.* **42**, 811–822  
1399 (2007).
- 1400 207. Archer, S. L. *et al.* Nitric oxide and cGMP cause vasorelaxation by activation of a  
1401 charybdotoxin-sensitive K channel by cGMP-dependent protein kinase. *Proc.*  
1402 *Natl. Acad. Sci. U. S. A.* **91**, 7583–7587 (1994).
- 1403 208. Roy, B., Halvey, E. J. & Garthwaite, J. An enzyme-linked receptor mechanism for  
1404 nitric oxide-activated guanylyl cyclase. *J. Biol. Chem.* **283**, 18841–18851 (2008).
- 1405 209. Mo, E., Amin, H., Bianco, I. H. & Garthwaite, J. Kinetics of a cellular nitric  
1406 oxide/cGMP/phosphodiesterase-5 pathway. *J. Biol. Chem.* **279**, 26149–26158  
1407 (2004).
- 1408 210. Hirano, Y., Stefanovic, B. & Silva, A. C. Spatiotemporal evolution of the functional

- 1409 magnetic resonance imaging response to ultrashort stimuli. *J. Neurosci.* **31**,  
1410 1440–1447 (2011).
- 1411 211. Cardoso, M. M. B. B. *et al.* The neuroimaging signal is a linear sum of neurally  
1412 distinct stimulus- and task-related components. *Nat. Neurosci.* **15**, 1298–1306  
1413 (2012).
- 1414 212. Arichi, T. *et al.* Development of BOLD signal hemodynamic responses in the  
1415 human brain. *Neuroimage* **63**, 663–673 (2012).
- 1416 213. Slaughter, W. & Petrolito, J. Linearized Theory of Elasticity. *Appl. Mech. Rev.* **55**,  
1417 B90 (2002).
- 1418 214. Donea, J., Huerta, A., Ponthot, J.-P. & Rodríguez-Ferran, A. Arbitrary Lagrangian-  
1419 Eulerian Methods. in *Encyclopedia of Computational Mechanics Second Edition*  
1420 1–23 (John Wiley & Sons, Ltd, 2017). doi:10.1002/9781119176817.ecm2009
- 1421 215. Boynton, G. M., Engel, S. A., Glover, G. H. & Heeger, D. J. *Linear Systems*  
1422 *Analysis of Functional Magnetic Resonance Imaging in Human V1. The Journal of*  
1423 *Neuroscience* **16**, (1996).
- 1424 216. Glover G.H. *Deconvolution of impulse response in event-related BOLD fMRI.* .  
1425 *Neuroimage* (1999).
- 1426 217. Antunes, F., Boveris, A. & Cadenas, E. On the mechanism and biology of  
1427 cytochrome oxidase inhibition by nitric oxide. *Proc. Natl. Acad. Sci.* **101**, 16774–  
1428 16779 (2004).
- 1429 218. Cooper, C. E., Mason, M. G. & Nicholls, P. A dynamic model of nitric oxide

- 1430 inhibition of mitochondrial cytochrome c oxidase. *Biochim. Biophys. Acta* **1777**,  
1431 867–76 (2008).
- 1432 219. Cleeter, M. W., Cooper, J. M., Darley-Usmar, V. M., Moncada, S. & Schapira, a  
1433 H. Reversible inhibition of cytochrome c oxidase, the terminal enzyme of the  
1434 mitochondrial respiratory chain, by nitric oxide. Implications for neurodegenerative  
1435 diseases. *FEBS Lett.* **345**, 50–54 (1994).
- 1436 220. Palacios-Callender, M., Hollis, V., Frakich, N., Mateo, J. & Moncada, S.  
1437 Cytochrome c oxidase maintains mitochondrial respiration during partial inhibition  
1438 by nitric oxide. *J. Cell Sci.* **120**, 160–165 (2006).
- 1439 221. Greengard, O., Federman, M. & Knox, W. E. Cytomorphometry of developing rat  
1440 liver and its application to enzymic differentiation. *J. Cell Biol.* **52**, 261–272 (1972).
- 1441 222. Santisakultarm, T. P. *et al.* In vivo two-photon excited fluorescence microscopy  
1442 reveals cardiac- and respiration-dependent pulsatile blood flow in cortical blood  
1443 vessels in mice. *Am. J. Physiol. - Hear. Circ. Physiol.* **302**, 1367–1377 (2012).
- 1444 223. Kobari, M. *et al.* Blood flow velocity in the pial arteries of cats, with particular  
1445 reference to the vessel diameter. *J. Cereb. Blood Flow Metab.* **4**, 110–114 (1984).
- 1446
- 1447
